# Supplementary material for: Effectiveness of Nasal Continuous Positive Airway Pressure vs Nasal Intermittent Positive Pressure Ventilation vs Noninvasive High-Frequency Oscillatory Ventilation as Support After Extubation of Neonates Born Extremely Preterm or With More Severe Respiratory Failure: A Secondary Analysis of a Randomized Clinical Trial
Source: PubMed Central journal article supplement (PMC10318479; doi:10.1001/jamanetworkopen.2023.21644), 2023-07-03

## Supplemental Online Content

Zhu X, Li F, Shi Y, Feng Z, De Luca D; Nasal Oscillation Post-Extubation (NASONE) Study Group. Effectiveness of nasal continuous positive airway pressure vs nasal intermittent positive pressure ventilation vs noninvasive high-frequency oscillatory ventilation as support after extubation of neonates born extremely preterm or with more severe respiratory failure: a secondary analysis of a randomized clinical trial. *JAMA Netw Open*. 2023;6(7):e2321644. doi:10.1001/jamanetworkopen.2023.21644

**eFigure 1.** CONSORT Flowchart of the Original NASONE Trial

**eTable 1.** Basic Characteristics of Population Subgroups Complementary to the Subgroups of Interest (i.e.: Subgroups With More Mature Neonates and Those With Less Severe Respiratory Failure)

**eAppendix.** *P* Values for Figures

**eTable 2.** Reasons for Reintubation in the Subgroups

**eTable 3.** Interaction Analyses for All Coprimary Outcomes

**eTable 4.** Expected False-Positive Rates for All Coprimary Outcomes

**eFigure 2.** Kaplan-Meier Analysis for Reintubations

**eFigure 3.** Secondary Outcomes: Use of Postnatal Steroids (A), In-Hospital Mortality (B) and BPD/Mortality (C)

**eFigure 4.** Secondary Outcomes: Airleaks (A), Number of Apneas/Week (B) and PIPP Score (C)

**eFigure 5.** Secondary Outcomes: Weekly Weight Gain (A) and Severe Nasal Skin Injury (B)

**eFigure 6.** Secondary Outcomes: IVH (A), NEC (B) and ROP (C)

**eFigure 7.** Secondary Outcomes: Duration of Oxygen Supplementation (A) and of Study Intervention (B)

This supplemental material has been provided by the authors to give readers additional information about their work.

**eFigure 1. CONSORT Flowchart of the Original NASONE Trial.** For the 80 neonates who met an exclusion criterion, the distribution was as follows: grade-IV IVH (n=21), major congenital anomalies/chromosomal abnormalities (n=9), upper respiratory tract abnormalities (n=11), need for surgery known before the first extubation (n=35), birth weight <600g (n=4). The allocated treatment was discontinued in 53 neonates because their parents/guardians withdrew their consent to participation in the trial.

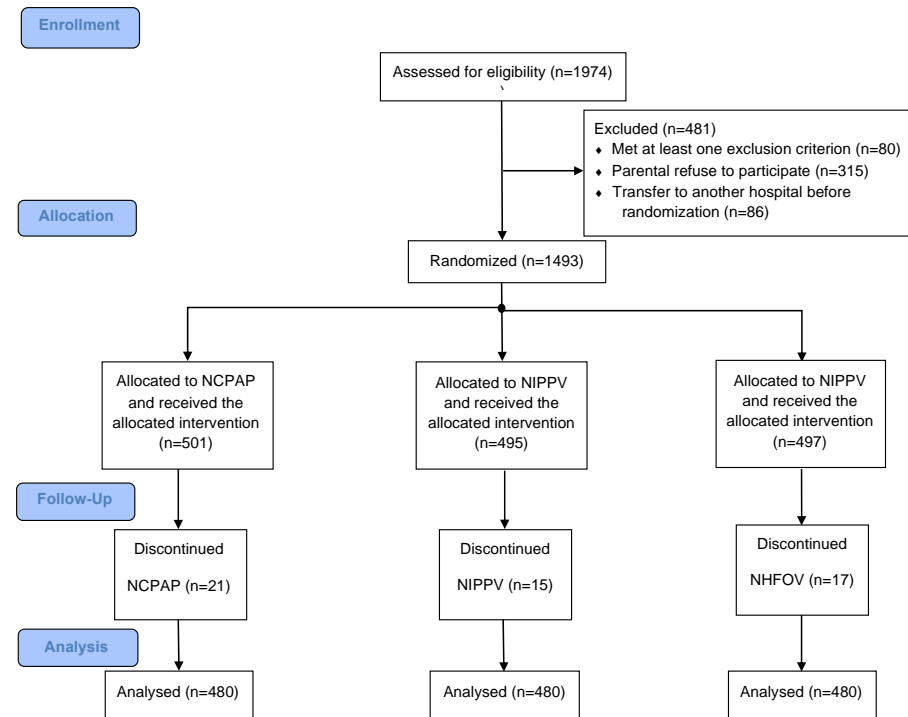

**eTable 1. Basic Characteristics of Population Subgroups Complementary to the Subgroups of Interest (i.e.: Subgroups With More Mature Neonates and Those With Less Severe Respiratory Failure).** Data are expressed as mean (standard deviation) or number (%). Prenatal steroid is considered if complete (two 12 mg doses of betamethasone, 24 h apart from each other). Surfactant replacement was always performed by intubation-surfactant-extubation technique. CRIB-II, OI and pH are dimensionless variables. **Abbreviations:** CRIB-II: Clinical Risk Index for Babies-II score; FiO<sub>2</sub>: inspired oxygen fraction; NCPAP: nasal continuous positive airway pressure; NHFOV: noninvasive high-frequency oscillation ventilation; NIPPV: noninvasive positive pressure ventilation; OI: oxygenation index (OI=(FiO<sub>2</sub>×Paw)×100/PaO<sub>2</sub>); PaCO<sub>2</sub>: partial pressure of carbon dioxide; PaO<sub>2</sub>: partial oxygen pressure; Paw: mean airway pressure; SGA: small for gestational age.

|                         | >28 weeks' gestation |               |               |      | Ventilated < 1week from birth |               |               |      | CO <sub>2</sub> ≤ 50mmHg before or in the 24h after the extubation |               |               |      |
|-------------------------|----------------------|---------------|---------------|------|-------------------------------|---------------|---------------|------|--------------------------------------------------------------------|---------------|---------------|------|
|                         | NCPAP (N=346)        | NIPPV (N=320) | NHFOV (N=319) | p    | NCPAP (N=370)                 | NIPPV (N=349) | NHFOV (N=346) | p    | NCPAP (N=357)                                                      | NIPPV (N=386) | NHFOV (N=390) | p    |
| Gestational age (weeks) | 30.4 (1.1)           | 30.4 (1.1)    | 30.5 (1.1)    | 0.55 | 29.7 (1.6)                    | 29.5 (1.8)    | 29.6 (1.8)    | 0.22 | 29.7 (1.6)                                                         | 29.4 (1.8)    | 29.5 (1.8)    | 0.17 |
| Birth weight (g)        | 1441 (298)           | 1482 (343)    | 1461 (330)    | 0.27 | 1382 (304)                    | 1358 (353)    | 1369 (362)    | 0.64 | 1378 (318)                                                         | 1340 (359)    | 1348 (353)    | 0.29 |
| Male sex                | 191 (55.2%)          | 192 (60%)     | 198 (62%)     | 0.18 | 214 (57.8%)                   | 213 (61%)     | 215 (62.1%)   | 0.47 | 203 (56.9%)                                                        | 233 (60.4%)   | 241 (61.8%)   | 0.37 |
| SGA neonates            | 36 (10.1%)           | 29 (9%)       | 21 (6.6%)     | 0.21 | 35 (9.5%)                     | 34 (9.7%)     | 22 (6.4%)     | 0.21 | 34 (9.5%)                                                          | 36 (9.3%)     | 26 (6.7%)     | 0.28 |
| Twins                   | 94 (27.2%)           | 97 (30.3%)    | 97 (30.4%)    | 0.57 | 98 (26.5%)                    | 110 (31.5%)   | 103 (29.8%)   | 0.32 | 102 (28.6%)                                                        | 126 (32.6%)   | 127 (32.6%)   | 0.40 |
| Cesarean section        | 210 (60.7%)          | 198 (61.9%)   | 204 (63.9%)   | 0.68 | 202 (54.6%)                   | 184 (52.7%)   | 180 (52%)     | 0.77 | 191 (53.5%)                                                        | 211 (54.7%)   | 208 (53.3%)   | 0.92 |
| Prenatal steroids       | 144 (41.6%)          | 161 (50.3%)   | 137 (42.9%)   | 0.06 | 161 (43.5%)                   | 181 (51.9%)   | 169 (48.8%)   | 0.07 | 149 (41.7%)                                                        | 194 (50.2%)   | 179 (45.9%)   | 0.06 |
| CRIB-II score           | 4.1 (2.2)            | 3.9 (2.4)     | 4 (2.4)       | 0.58 | 4.7 (2.8)                     | 4.9 (3)       | 5 (3.2)       | 0.34 | 4.9 (2.9)                                                          | 5.1 (3.2)     | 5.3 (3.2)     | 0.24 |
| 5' Apgar score          | 9 [9-10]             | 9 [8-10]      | 9 [9-10]      | 0.87 | 9 [8-10]                      | 9 [8-10]      | 9 [9-10]      | 0.78 | 9 [9-10]                                                           | 9 [9-10]      | 9 [8-10]      | 0.67 |
| Surfactant replacement  | 287 (82.9%)          | 266 (83.1%)   | 259 (81.2%)   | 0.77 | 307 (83%)                     | 296 (84.8%)   | 283 (81.2%)   | 0.56 | 299 (83.8%)                                                        | 330 (85.5%)   | 322 (82.6%)   | 0.53 |
| Early onset sepsis      | 10 (2.9%)            | 6 (1.9%)      | 8 (2.5%)      | 0.69 | 8 (2.2%)                      | 8 (2.3%)      | 9 (2.6%)      | 0.92 | 7 (2%)                                                             | 7 (1.8%)      | 7 (1.8%)      | 0.98 |

**eAppendix. P Values for Figures**

For Figure 1A in the text, for neonates of gestational age 28 or fewer weeks,  $P = .007$  for noninvasive positive pressure ventilation (NIPPV) vs nasal continuous positive airway pressure (NCPAP), and  $P < .001$  for noninvasive high-frequency oscillation ventilation (NHFOV) vs NCPAP. For neonates invasively ventilated for at least 1 week,  $P < .001$  for NIPPV vs NCPAP and NHFOV vs NCPAP. For neonates with CO<sub>2</sub> greater than 50 mm Hg before or in the 24 hours after extubation,  $P = .003$  for NIPPV vs NCPAP, and  $P < .001$  for NHFOV vs NCPAP. For Figure 1B in the text, for neonates of gestational age 28 or fewer weeks,  $P < .001$  for NIPPV vs NCPAP and NHFOV vs NCPAP. For neonates invasively ventilated for at least 1 week,  $P < .001$  for NIPPV vs NCPAP and NHFOV vs NCPAP. For neonates with CO<sub>2</sub> greater than 50 mm Hg before or in the 24 hours after extubation,  $P < .001$  for NIPPV vs NCPAP, and  $P = .01$  for NHFOV vs NCPAP.

For Figure 2A in the text, for the mean difference in IMV duration in neonates of gestational age up to 28 weeks,  $P = .03$  for noninvasive positive pressure ventilation (NIPPV) vs nasal continuous positive airway pressure (NCPAP), and  $P = .008$  for noninvasive high-frequency oscillation ventilation (NHFOV) vs NCPAP. For the mean difference in IMV duration in neonates invasively ventilated for at least 1 week,  $P < .001$  for NIPPV vs NCPAP and NHFOV vs NCPAP, and  $P = .03$  for NIPPV vs NHFOV. For the mean difference in IMV duration in neonates with CO<sub>2</sub> greater than 50 mm Hg before or in the 24 hours after extubation,  $P = .04$  for NHFOV vs NCPAP. For Figure 2B in the text, for the mean difference in ventilator-free days for neonates with CO<sub>2</sub> greater than 50 mm Hg before or in the 24 hours after extubation,  $P = .04$  for NIPPV vs NCPAP.

For Figure 3A in the text, for the difference in risk of BPD in neonates of gestational age 28 or fewer weeks,  $P = .01$  for noninvasive high-frequency oscillation ventilation (NHFOV) vs nasal continuous positive airway pressure (NCPAP). For Figure 3B in the text, for the difference in risk of moderate-to-severe BPD in neonates of gestational age 28 or fewer weeks,  $P = .04$  for NHFOV vs NCPAP. For the difference in risk of moderate-to-severe BPD in neonates invasively ventilated for at least 1 week,  $P = .02$  for NHFOV vs NCPAP. For the difference in risk of moderate-to-severe BPD in neonates with CO<sub>2</sub> greater than 50 mm Hg before or in the 24 hours after extubation,  $P = .03$  for NHFOV vs NCPAP.

For Figure 4A in the text, for the difference in oxygenation index for neonates of gestational age 28 or fewer weeks,  $P = .001$  for noninvasive high-frequency oscillation ventilation (NHFOV) vs nasal continuous positive airway pressure (NCPAP), and  $P = .05$  for noninvasive positive pressure ventilation (NIPPV) vs NHFOV. For the difference in oxygenation index for neonates invasively ventilated for at least 1 week,  $P = .04$  for NHFOV vs NCPAP, and  $P = .007$  for NIPPV vs NHFOV. For the difference in oxygenation index for neonates with CO<sub>2</sub> greater than 50 mm Hg before or in the 24 hours after extubation,  $P = .005$  for NHFOV vs NCPAP, and  $P = .04$  for NIPPV vs NHFOV. For Figure 4B in the text, for the difference in CO<sub>2</sub> for neonates of gestational age 28 or fewer weeks,  $P = .02$  for NHFOV vs NCPAP. For the difference in CO<sub>2</sub> for neonates invasively ventilated for at least 1 week,  $P = .04$  for NIPPV vs NCPAP, and  $P = .02$  for NHFOV vs NCPAP.

**eTable 2. Reasons for Reintubation in the Subgroups.** Raw data are expressed as number (%); differences between study arms are expressed as risk difference (95% CI) for the reintubations. The frequency of refractory hypoxemia in the subgroup of interest is significantly different (neonates  $\leq 28^{+6}$  weeks' gestation: overall  $p=0.006$ ; neonates ventilated  $\geq 1$  week from birth: overall  $p=0.0003$ ; neonates with  $\text{CO}_2 > 50$  mmHg before or in the 24h after the extubation: overall  $p=0.001$ ). **Abbreviations:** NCPAP: nasal continuous positive airway pressure; NHFOV: non-invasive high-frequency oscillation ventilation; NIPPV: noninvasive positive pressure ventilation.

| Neonates $\leq 28^{+6}$ weeks' gestation     |                  |                  |                  |                |               |                |                  |                |            |
|----------------------------------------------|------------------|------------------|------------------|----------------|---------------|----------------|------------------|----------------|------------|
|                                              | NCPAP<br>(N=134) | NIPPV<br>(N=160) | NHFOV<br>(N=161) | NCPAP - NIPPV  |               | NCPAP - NHFOV  |                  | NIPPV - NHFOV  |            |
|                                              |                  |                  |                  | Difference     | Post-hoc p    | Difference     | Post-hoc p       | Difference     | Post-hoc p |
| Severe respiratory acidosis                  | 7(5.2%)          | 4(2.5%)          | 3(1.8%)          | 2.7(-1.8;8.1)  | 0.24          | 3.3(-1.0;8.7)  | 0.19             | 0.6(-3.1;4.6)  | 0.72       |
| Refractory hypoxemia                         | 36(26.9%)        | 28(17.5%)        | 22(13.7%)        | 9.4(-0.1;18.9) | <b>0.05</b>   | 13.2(4.0;22.4) | <b>0.005</b>     | 3.8(-4.2;11.8) | 0.34       |
| Severe apneas                                | 11(8.2%)         | 9(5.6%)          | 7(4.3%)          | 2.6(-3.3;9.0)  | 0.38          | 3.8(-1.8;10.2) | 0.17             | 1.3(-3.8;6.5)  | 0.60       |
| Pulmonary hemorrhage                         | 1(0.7%)          | 0                | 0                | 0              | --            | 0              | --               | 0              | --         |
| Hemodynamic instability                      | 1(0.7%)          | 3(1.9)           | 3(1.8%)          | -1.1(-2.4;4.7) | 0.63          | -1.1(-2.5;4.6) | 0.63             | 0(-2.8;2.9)    | >0.99      |
| Cardio-respiratory arrest                    | 1(0.7%)          | 0                | 0                | 0              | --            | 0              | --               | 0              | --         |
| Neonates >28 weeks' gestation                |                  |                  |                  |                |               |                |                  |                |            |
|                                              | NCPAP<br>(N=346) | NIPPV<br>(N=320) | NHFOV<br>(N=319) | NCPAP - NIPPV  |               | NCPAP - HFOV   |                  | NIPPV - NHFOV  |            |
|                                              |                  |                  |                  | Difference     | Post-hoc p    | Difference     | Post-hoc p       | Difference     | Post-hoc p |
| Severe respiratory acidosis                  | 14(4%)           | 4(1.2%)          | 3(0.9%)          | 2.8(0.3;5.5)   | <b>0.03</b>   | 3.1(0.7;5.8)   | <b>0.01</b>      | 0.3(-1.6;2.3)  | >0.99      |
| Refractory hypoxemia                         | 41(11.8%)        | 25(7.8%)         | 16(5%)           | 4.0(-0.5;8.6)  | 0.08          | 6.8(2.6;11.1)  | <b>0.002</b>     | 2.8(-1.1;6.7)  | 0.15       |
| Severe apneas                                | 5(1.4%)          | 3(0.9%)          | 2(0.6%)          | 0.5(-1.4;2.5)  | 0.73          | 0.8(-1.0;2.7)  | 0.45             | 0.3(-1.4;2.1)  | >0.99      |
| Pulmonary hemorrhage                         | 1(0.3%)          | 1(0.3%)          | 1(0.3%)          | 0(-1.3;1.5)    | >0.99         | 0(-1.3;1.5)    | >0.99            | 0(-1.3;1.5)    | >0.99      |
| Hemodynamic instability                      | 4(1.1%)          | 4(1.2%)          | 4(1.2%)          | -0.1(-1.8;2.1) | >0.99         | -0.1(-1.8;2.1) | >0.99            | 0(-2.0;2.0)    | >0.99      |
| Cardio-respiratory arrest                    | 1(0.3%)          | 3(0.9%)          | 2(0.6%)          | -0.6(-0.8;2.4) | 0.35          | -0.3(-1.4;2.1) | 0.61             | 0.3(-1.4;2.1)  | >0.99      |
| Neonates ventilated $\geq 1$ week from birth |                  |                  |                  |                |               |                |                  |                |            |
|                                              | NCPAP<br>(N=110) | NIPPV<br>(N=131) | NHFOV<br>(N=134) | NCPAP - NIPPV  |               | NCPAP - HFOV   |                  | NIPPV - NHFOV  |            |
|                                              |                  |                  |                  | Difference     | Post-hoc p    | Difference     | Post-hoc p       | Difference     | Post-hoc p |
| Severe respiratory acidosis                  | 5(4.5%)          | 2(1.5%)          | 1(0.7%)          | 3.0(-1.6;8.8)  | 0.25          | 3.8(-0.4;9.5)  | 0.09             | 0.8(-2.7;4.7)  | 0.62       |
| Refractory hypoxemia                         | 31(28.2%)        | 16(12.2%)        | 14(10.4%)        | 16.0(5.8;26.1) | <b>0.002</b>  | 17.7(7.9;27.6) | <b>&lt;0.001</b> | 1.8(-6.0;9.6)  | 0.65       |
| Severe apneas                                | 8(7.3%)          | 6(4.6%)          | 3(2.2%)          | 2.7(-3.5;9.6)  | 0.37          | 5.0(-0.4;11.6) | 0.07             | 2.3(-2.5;7.6)  | 0.33       |
| Pulmonary hemorrhage                         | 1(0.9%)          | 0                | 0                | 0              | --            | 0              | --               | 0              | --         |
| Hemodynamic instability                      | 1(0.9%)          | 1(0.7%)          | 0                | >0.99          | 0.1(-3.4;4.2) | 0              | --               | 0              | --         |
| Cardio-respiratory arrest                    | 0                | 0                | 0                | 0              | --            | 0              | --               | 0              | --         |
| Ventilated < 1 week from birth               |                  |                  |                  |                |               |                |                  |                |            |
|                                              | NCPAP<br>(N=370) | NIPPV<br>(N=349) | NHFOV<br>(N=346) | NCPAP - NIPPV  |               | NCPAP - NHFOV  |                  | NIPPV - NHFOV  |            |
|                                              |                  |                  |                  | Difference     | Post-hoc p    | Difference     | Post-hoc p       | Difference     | Post-hoc p |
| Severe respiratory acidosis                  | 16(4.3%)         | 6(1.7%)          | 5(1.4%)          | 2.6(0.0;5.3)   | <b>0.04</b>   | 2.9(0.4;5.6)   | <b>0.02</b>      | 0.3(-1.8;2.4)  | 0.99       |
| Refractory hypoxemia                         | 46(12.4%)        | 37(10.6%)        | 24(6.9%)         | 1.8(-2.3;6.5)  | 0.53          | 5.5(1.1;9.8)   | <b>0.01</b>      | 3.7(-0.6;7.9)  | 0.07       |

|                                                                                           |                          |                          |                          |                      |                   |                      |                   |                      |                   |
|-------------------------------------------------------------------------------------------|--------------------------|--------------------------|--------------------------|----------------------|-------------------|----------------------|-------------------|----------------------|-------------------|
| Severe apneas                                                                             | 8(2.1%)                  | 6(1.7%)                  | 6(1.7%)                  | 0.4(-1.8;2.7)        | 0.67              | 0.4(-1.8;2.7)        | 0.68              | 0(-2.2;2.2)          | >0.99             |
| Pulmonary hemorrhage                                                                      | 1(0.3%)                  | 1(0.3%)                  | 1(0.3%)                  | 0(-1.3;1.3)          | >0.99             | 0(-1.3;1.3)          | >0.99             | 0(-1.3;1.3)          | >0.99             |
| Hemodynamic instability                                                                   | 4(1.1%)                  | 6(1.7%)                  | 7(2%)                    | -0.6(-1.3;2.7)       | 0.54              | -0.9(-1.0;3.1)       | 0.37              | -0.3(-1.9;2.6)       | 0.77              |
| Cardio-respiratory arrest                                                                 | 2(0.5%)                  | 3(0.8%)                  | 2(0.6%)                  | -0.3(-1.2;2.0)       | 0.67              | 0(-1.4;1.6)          | >0.99             | 0.3(-1.3;2.0)        | >0.99             |
| <b>Neonates with CO<sub>2</sub> &gt; 50mmHg before or in the 24h after the extubation</b> |                          |                          |                          |                      |                   |                      |                   |                      |                   |
|                                                                                           | <b>NCPAP<br/>(N=123)</b> | <b>NIPPV<br/>(N=94)</b>  | <b>NHFOV<br/>(N=90)</b>  | <b>NCPAP - NIPPV</b> |                   | <b>NCPAP - NHFOV</b> |                   | <b>NIPPV - NHFOV</b> |                   |
|                                                                                           |                          |                          |                          | <b>Difference</b>    | <b>Post-hoc p</b> | <b>Difference</b>    | <b>Post-hoc p</b> | <b>Difference</b>    | <b>Post-hoc p</b> |
| Severe respiratory acidosis                                                               | 6(4.9%)                  | 2(2.1%)                  | 2(2.2%)                  | 2.7(-3.1;8.3)        | 0.47              | 2.6(-3.4;8.2)        | 0.47              | -0.1(-5.4;5.8)       | >0.99             |
| Refractory hypoxemia                                                                      | 45(36.6%)                | 17(18.1%)                | 16(17.8%)                | 18.5(6.5;29.4)       | <b>0.003</b>      | 18.8(6.6;29.7)       | <b>0.003</b>      | 0.3(-10.9;11.4)      | >0.99             |
| Severe apneas                                                                             | 11(8.9%)                 | 7(7.4%)                  | 4(4.4%)                  | 1.5(-6.6;8.9)        | 0.69              | 4.5(-3.0;11.1)       | 0.28              | 3.0(-4.5;10.6)       | 0.54              |
| Pulmonary hemorrhage                                                                      | 0                        | 0                        | 0                        | 0                    | --                | 0                    | --                | 0                    | --                |
| Hemodynamic instability                                                                   | 2(1.6%)                  | 4(4.2%)                  | 3(3.3%)                  | -2.6(-2.2;8.9)       | 0.41              | -1.7(-2.9;7.8)       | 0.65              | 0.9(-5.6;7.5)        | >0.99             |
| Cardio-respiratory arrest                                                                 | 0                        | 0                        | 0                        | 0                    | --                | 0                    | --                | 0                    | --                |
| <b>Neonates with CO<sub>2</sub> ≤ 50mmHg before or in the 24h after the extubation</b>    |                          |                          |                          |                      |                   |                      |                   |                      |                   |
|                                                                                           | <b>NCPAP<br/>(N=357)</b> | <b>NIPPV<br/>(N=386)</b> | <b>NHFOV<br/>(N=390)</b> | <b>NCPAP - NIPPV</b> |                   | <b>NCPAP - NHFOV</b> |                   | <b>NIPPV - NHFOV</b> |                   |
|                                                                                           |                          |                          |                          | <b>Difference</b>    | <b>Post-hoc p</b> | <b>Difference</b>    | <b>Post-hoc p</b> | <b>Difference</b>    | <b>Post-hoc p</b> |
| Severe respiratory acidosis                                                               | 15(4.2%)                 | 6(1.5%)                  | 4(1%)                    | 2.6(0.2;5.4)         | <b>0.03</b>       | 3.2(0.9;5.8)         | <b>0.009</b>      | 0.5(-1.2;2.4)        | 0.54              |
| Refractory hypoxemia                                                                      | 32(8.9%)                 | 36(9.3%)                 | 22(5.6%)                 | -0.3(-3.9;4.5)       | 0.78              | 3.3(-0.4;7.2)        | 0.10              | 3.7(0;7.5)           | 0.05              |
| Severe apneas                                                                             | 5(1.4%)                  | 5(1.3%)                  | 5(1.3%)                  | 0.1(-1.8;2.1)        | >0.99             | 0.1(-1.7;2.1)        | >0.99             | 0(-1.8;1.9)          | >0.99             |
| Pulmonary hemorrhage                                                                      | 2(0.5%)                  | 1(0.2%)                  | 1(0.2%)                  | 0.3(-0.9;1.8)        | 0.61              | 0.3(-0.9;1.8)        | 0.61              | 0(-1.2;1.2)          | >0.99             |
| Hemodynamic instability                                                                   | 3(0.8%)                  | 3(0.8%)                  | 4(1%)                    | 0(-1.5;1.7)          | >0.99             | -0.2(-1.5;1.8)       | >0.99             | -0.2(-1.3;1.9)       | >0.99             |
| Cardio-respiratory arrest                                                                 | 2(0.5%)                  | 3(0.8%)                  | 2(0.5%)                  | -0.2(-1.3;1.7)       | >0.99             | 0(-1.3;1.5)          | >0.99             | 0.2(-1.2;1.8)        | >0.99             |

**eTable 3. Interaction Analyses for All Coprimary Outcomes.** Data are expressed as hazard ratio (for reintubation and early reintubations) or  $\beta$  coefficient (for duration of invasive ventilation and ventilator-free days) relative to the interaction term between the study intervention and the variable used to define subgroups, per each regression model. **Abbreviations:** CI: confidence interval; HR: hazard ratio; IMV: invasive mechanical ventilation; VFD: ventilator-free days.

|                                                                | HR or $\beta$ | 95%CI       | <i>p</i>         |
|----------------------------------------------------------------|---------------|-------------|------------------|
| <b>Neonates <math>\leq 28^{+6}</math> weeks' gestation</b>     |               |             |                  |
| Duration of IMV                                                | 0.09          | -1.1; 1.2   | 0.945            |
| Reintubations                                                  | 1.007         | 0.82; 1.24  | 0.950            |
| Early reintubations                                            | 1.001         | 0.77; 1.30  | 0.995            |
| VFD                                                            | 4.63          | 2.7; 10.2   | <b>&lt;0.001</b> |
| <b>Neonates ventilated <math>\geq 1</math> week from birth</b> |               |             |                  |
| Duration of IMV                                                | 1.6           | 0.04; 0.9   | <b>0.032</b>     |
| Reintubations                                                  | 0.959         | 0.83; 1.1   | 0.569            |
| Early reintubations                                            | 1.05          | 0.9; 1.23   | 0.529            |
| VFD                                                            | 0.64          | -0.79; 2    | 0.395            |
| <b>Neonates with <math>CO_2 &gt; 50</math> mmHg</b>            |               |             |                  |
| Duration of IMV                                                | -0.24         | -0.1; 0.04  | 0.367            |
| Reintubations                                                  | 1.005         | 0.98; 1.023 | 0.571            |
| Early reintubations                                            | 1.01          | 0.99; 1.029 | 0.317            |
| VFD                                                            | -0.42         | -0.39; 0.05 | 0.126            |

**eTable 4. Expected False-Positive Rates for All Coprimary Outcomes.** Abbreviations:

NCPAP: nasal continuous positive airway pressure; NHFOV: non-invasive high-frequency oscillation ventilation; NIPPV: noninvasive positive pressure ventilation; VFD: ventilator-free days.

| Reintubations                                                    |       | Duration IMV                                                     |       |
|------------------------------------------------------------------|-------|------------------------------------------------------------------|-------|
| <b>Neonates <math>\leq 28^{+6}</math> weeks' gestation</b>       |       | <b>Neonates <math>\leq 28^{+6}</math> weeks' gestation</b>       |       |
| NCPAP vs NIPPV                                                   | 0.018 | NCPAP vs NIPPV                                                   | 0.02  |
| NCPAP vs NHFOV                                                   | 0.007 | NCPAP vs NHFOV                                                   | 0.01  |
| NIPPV vs NHFOV                                                   | 0.04  | NIPPV vs NHFOV                                                   | 0.049 |
| <b>Neonates ventilated <math>\geq 1</math> week from birth</b>   |       | <b>Neonates ventilated <math>\geq 1</math> week from birth</b>   |       |
| NCPAP vs NIPPV                                                   | 0.008 | NCPAP vs NIPPV                                                   | 0.008 |
| NCPAP vs NHFOV                                                   | 0.003 | NCPAP vs NHFOV                                                   | 0.03  |
| NIPPV vs NHFOV                                                   | 0.04  | NIPPV vs NHFOV                                                   | 0.03  |
| <b>Neonates with <math>\text{CO}_2 &gt; 50\text{mmHg}</math></b> |       | <b>Neonates with <math>\text{CO}_2 &gt; 50\text{mmHg}</math></b> |       |
| NCPAP vs NIPPV                                                   | 0.014 | NCPAP vs NIPPV                                                   | 0.04  |
| NCPAP vs NHFOV                                                   | 0.004 | NCPAP vs NHFOV                                                   | 0.04  |
| NIPPV vs NHFOV                                                   | 0.04  | NIPPV vs NHFOV                                                   | 0.04  |
| <b>Early reintubations</b>                                       |       | <b>VFD</b>                                                       |       |
| <b>Neonates <math>\leq 28^{+6}</math> weeks' gestation</b>       |       | <b>Neonates <math>\leq 28^{+6}</math> weeks' gestation</b>       |       |
| NCPAP vs NIPPV                                                   | 0.008 | NCPAP vs NIPPV                                                   | 0.03  |
| NCPAP vs NHFOV                                                   | 0.005 | NCPAP vs NHFOV                                                   | 0.049 |
| NIPPV vs NHFOV                                                   | 0.04  | NIPPV vs NHFOV                                                   | 0.04  |
| <b>Neonates ventilated <math>\geq 1</math> week from birth</b>   |       | <b>Neonates ventilated <math>\geq 1</math> week from birth</b>   |       |
| NCPAP vs NIPPV                                                   | 0.007 | NCPAP vs NIPPV                                                   | 0.049 |
| NCPAP vs NHFOV                                                   | 0.006 | NCPAP vs NHFOV                                                   | 0.04  |
| NIPPV vs NHFOV                                                   | 0.049 | NIPPV vs NHFOV                                                   | 0.038 |
| <b>Neonates with <math>\text{CO}_2 &gt; 50\text{mmHg}</math></b> |       | <b>Neonates with <math>\text{CO}_2 &gt; 50\text{mmHg}</math></b> |       |
| NCPAP vs NIPPV                                                   | 0.008 | NCPAP vs NIPPV                                                   | 0.02  |
| NCPAP vs NHFOV                                                   | 0.013 | NCPAP vs NHFOV                                                   | 0.04  |
| NIPPV vs NHFOV                                                   | 0.04  | NIPPV vs NHFOV                                                   | 0.04  |



**eFigure 2. Kaplan-Meier Analysis for Reintubations.** Panel A, B and C show subgroup analysis for neonates  $\leq 28$  weeks' gestation, invasively ventilated for  $> 1$  week and in those with  $CO_2 > 50$  mmHg, respectively. Blue, violet and turquoise lines depict NCPAP, NIPPV and NHFOV arms, respectively. Curves are different at Logrank test ( $p < 0.001$ ). Open circles represent censored cases. **Abbreviations:** NCPAP: nasal continuous positive airway pressure; NHFOV: non-invasive high-frequency oscillation ventilation; NIPPV: noninvasive positive pressure ventilation.

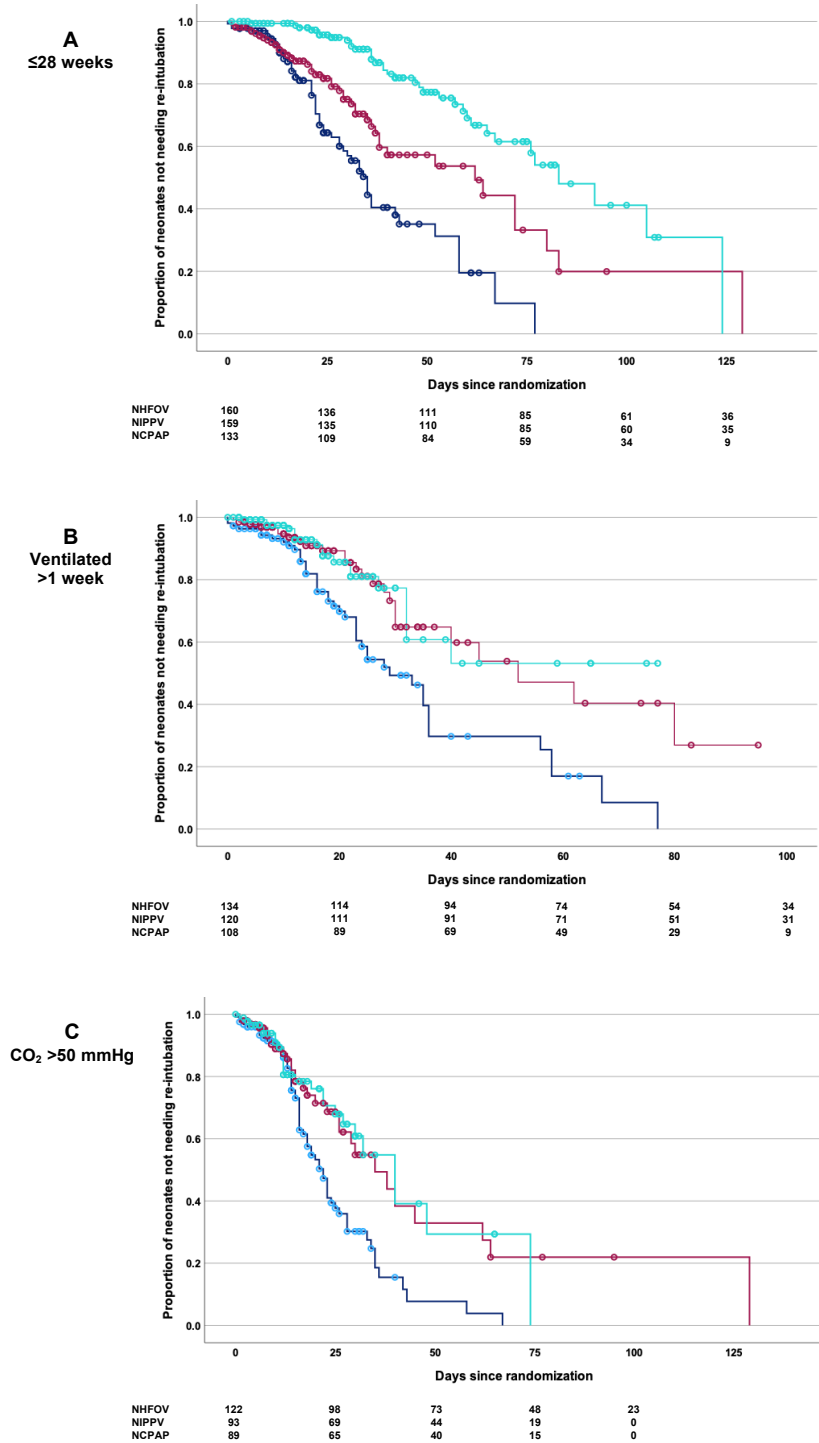

**eFigure 3. Secondary Outcomes: Use of Postnatal Steroids (A), In-Hospital Mortality (B) and BPD/Mortality (C).**

Subgroups of interest are highlighted with a grey background, alternate subgroups have no background. Data are shown as risk difference and 95% confidence interval and illustrated as Forrest plots per each subgroup. Squares and lines indicate the mean differences and their 95% confidence interval, respectively. Square size is proportional to the subgroup numerosity. Blue and green lines indicate comparisons significantly in favor of NIPPV and NHFOV, respectively (*p*-values for significant comparisons in subgroups of interest are as follows, **Panel C**: difference in risk of BPD/mortality composite endpoint in neonates with a gestational age  $\leq 28$  weeks: NHFOV vs NCPAP *p*=0.03). **Abbreviations**: BPD: bronchopulmonary dysplasia; CI: confidence interval; NCPAP: nasal continuous positive airway pressure; NHFOV: non-invasive high-frequency oscillation ventilation; NIPPV: noninvasive positive pressure ventilation.

**A**

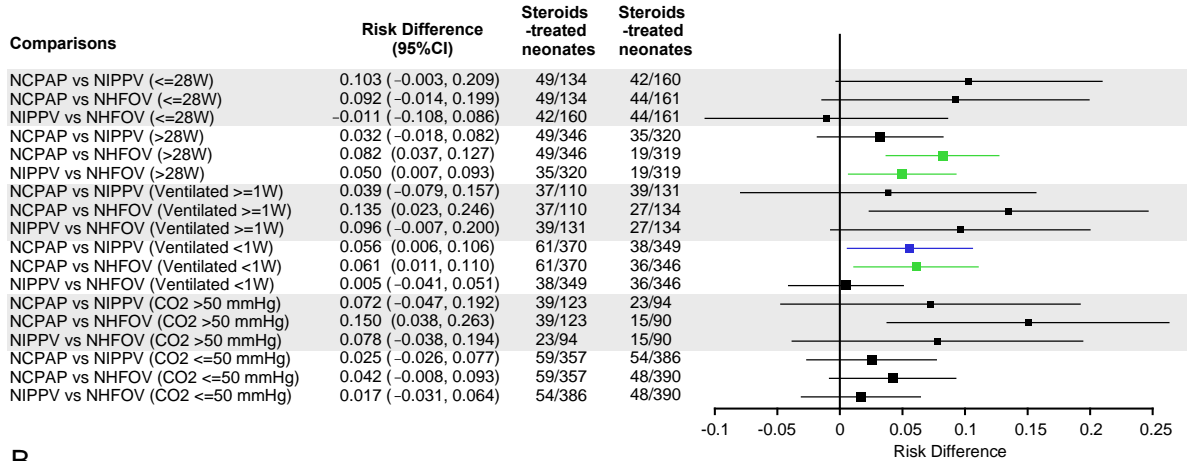

**B**

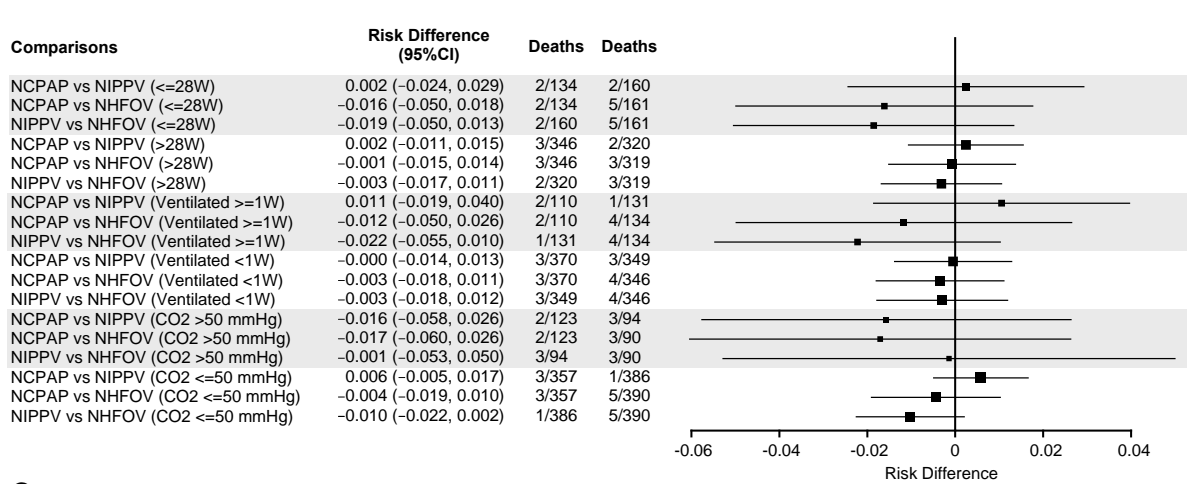

**C**

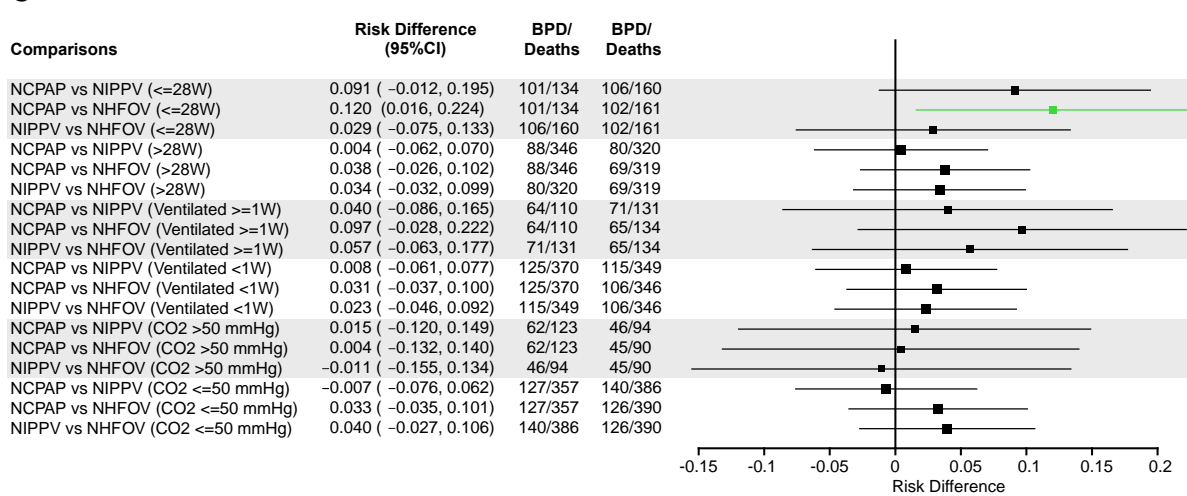

### eFigure 4. Secondary Outcomes: Airleaks (A), Number of Apneas/Week (B) and PIPP Score (C).

Subgroups of interest are highlighted with a grey background, alternate subgroups have no background. PIPP is a dimensionless variable. Data are shown as risk difference and 95% confidence interval (for airleaks) and as mean difference and 95% confidence interval (for the number of apneas/week and the PIPP score). Data are illustrated as Forrest plots per each subgroup. Squares and lines indicate the mean differences and their 95% confidence interval, respectively. Square size is proportional to the subgroup numerosity. Blue, green and red lines indicate comparisons significantly in favor of NIPPV, NHFOV and NCPAP, respectively ( $p$ -values for significant comparisons in subgroups of interest are as follows, **Panel B**: difference in mean number of apneas/week in neonates invasively ventilated for at least 1 week: NIPPV vs NCPAP  $p=0.03$ , NHFOV vs NCPAP  $p=0.03$ ; difference in mean number of apneas/week in neonates with  $CO_2 >50$  mmHg before or in the 24h after the extubation: NIPPV vs NCPAP  $p=0.03$ , NHFOV vs NCPAP  $p=0.03$ ). **Abbreviations**: CI: confidence interval; NCPAP: nasal continuous positive airway pressure; NHFOV: non-invasive high-frequency oscillation ventilation; NIPPV: noninvasive positive pressure ventilation; PIPP: premature infant pain profile.

**A**

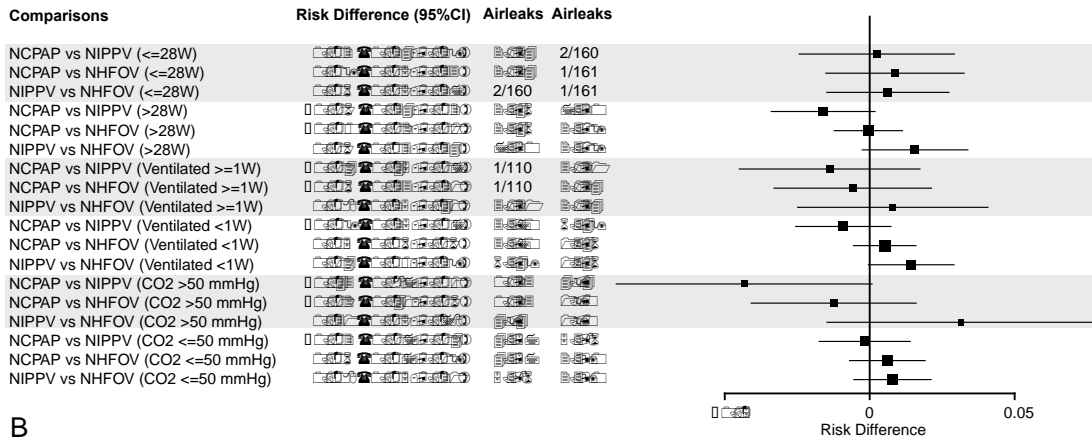

**B**

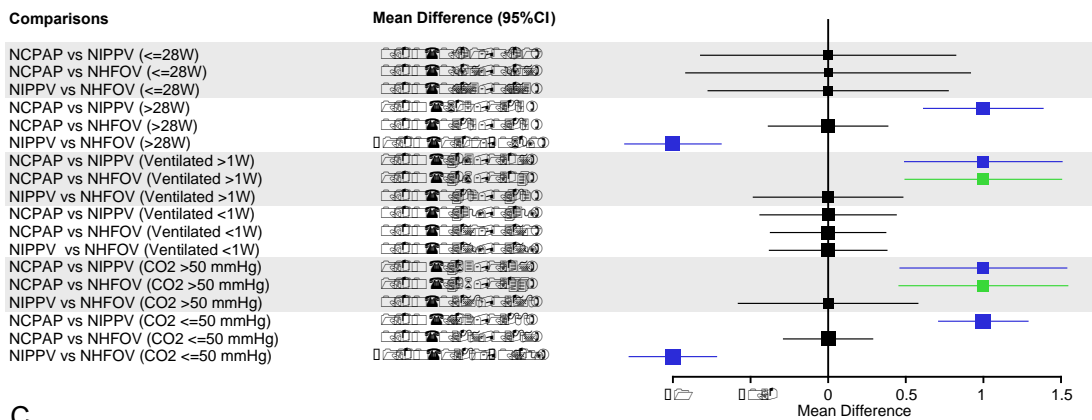

**C**

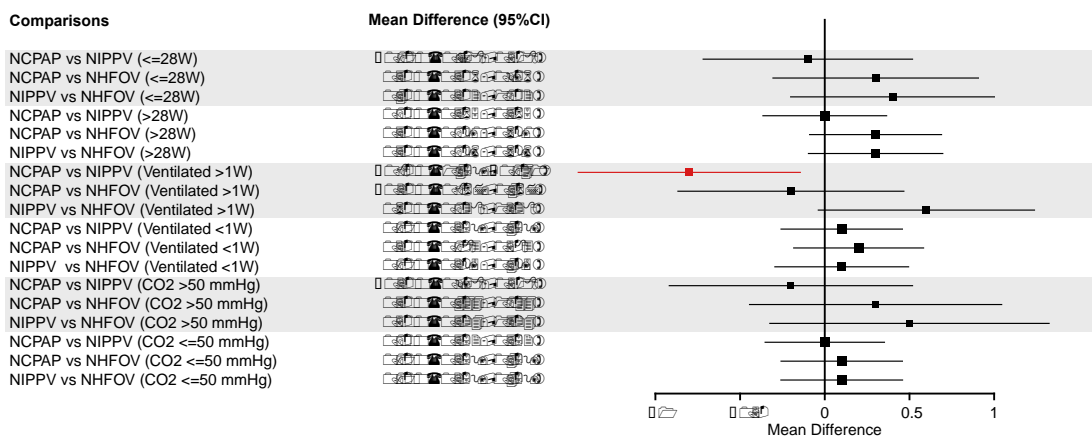

**eFigure 5. Secondary Outcomes: Weekly Weight Gain (A) and Severe Nasal Skin Injury (B).**

Subgroups of interest are highlighted with a grey background, alternate subgroups have no background. Weekly weight gain is expressed in grams; severe nasal skin injury was diagnosed if classified as grade III-IV using a dedicated dimensionless score; more details in the trial protocol). Data are shown as mean difference and 95% confidence interval (for weekly weight gain) and as risk difference and 95% confidence interval (for severe nasal skin injury); Data are illustrated as Forrest plots per each subgroup. Squares and lines indicate the mean differences and their 95% confidence interval, respectively. Square size is proportional to the subgroup numerosity. Blue and red lines indicate comparisons significantly in favor of NIPPV and NCPAP, respectively. **Abbreviations:** CI: confidence interval; NCPAP: nasal continuous positive airway pressure; NHFOV: non-invasive high-frequency oscillation ventilation; NIPPV: noninvasive positive pressure ventilation.

**A**

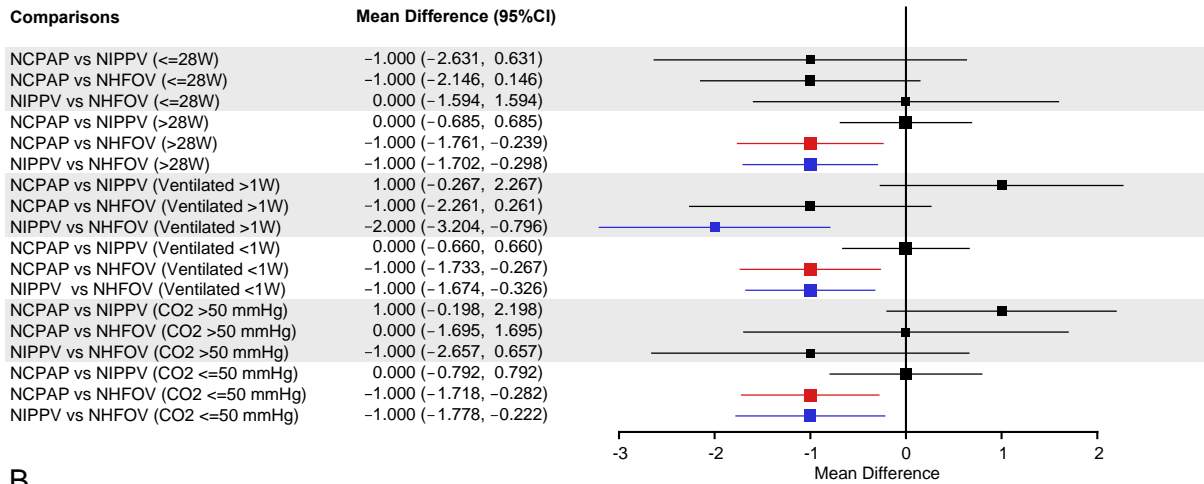

**B**

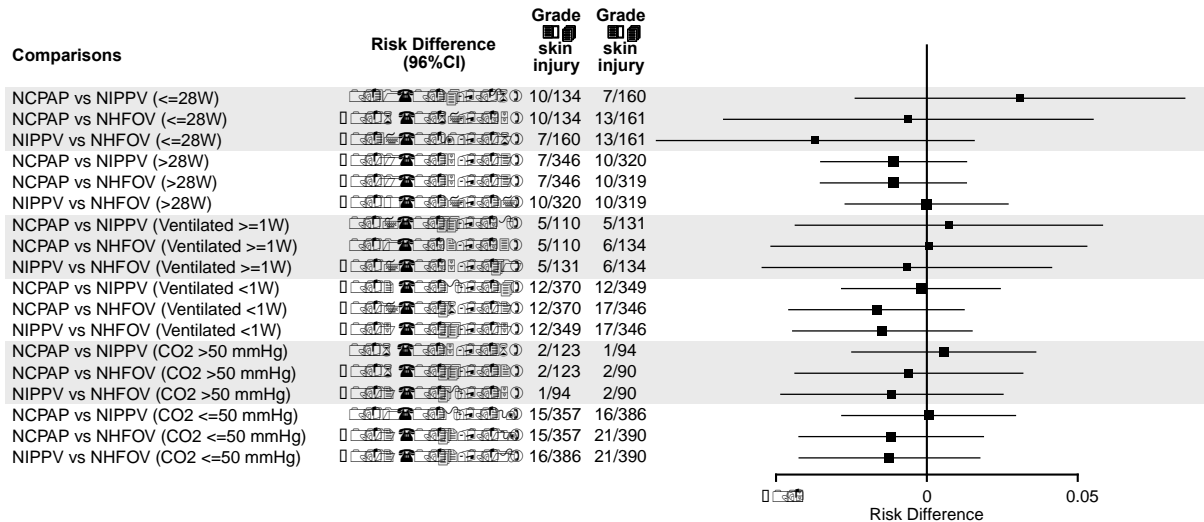

**eFigure 6. Secondary Outcomes: IVH (A), NEC (B) and ROP (C).** Subgroups of interest are highlighted with a grey background, alternate subgroups have no background. IVH were considered if >2<sup>nd</sup> grade, NEC were considered if ≥2<sup>nd</sup> stage and ROP were considered if >2<sup>nd</sup> stage (more details in the trial protocol). Data are shown as risk difference and 95% confidence interval. Data are illustrated as Forrest plots per each subgroup. Squares and lines indicate the mean differences and their 95% confidence interval, respectively. Square size is proportional to the subgroup numerosity. Blue and green lines indicate comparisons significantly in favor of NIPPV and NHFOV, respectively. **Abbreviations:** CI: confidence interval; IVH: intra-ventricular hemorrhage; NEC: necrotizing enterocolitis; NCPAP: nasal continuous positive airway pressure; NHFOV: non-invasive high-frequency oscillation ventilation; NIPPV: noninvasive positive pressure ventilation; ROP: retinopathy of prematurity.

**A**

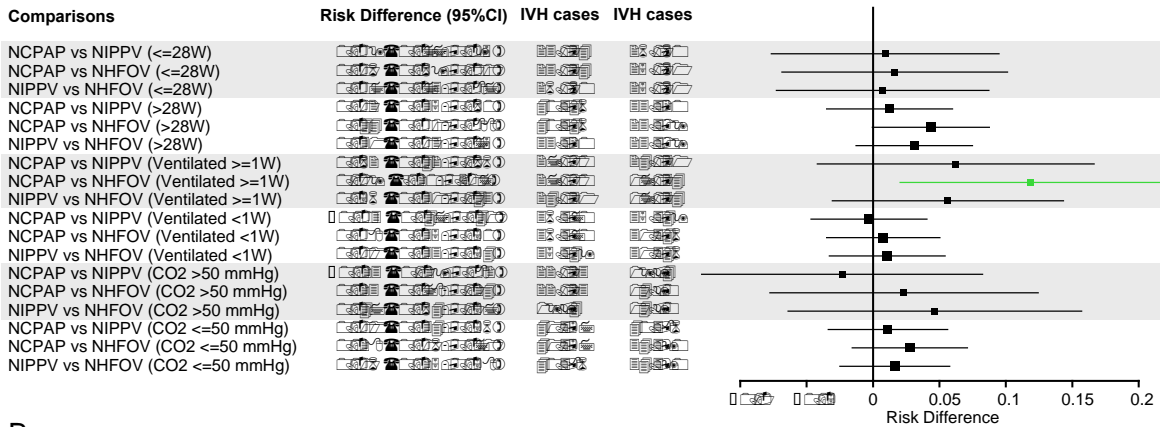

**B**

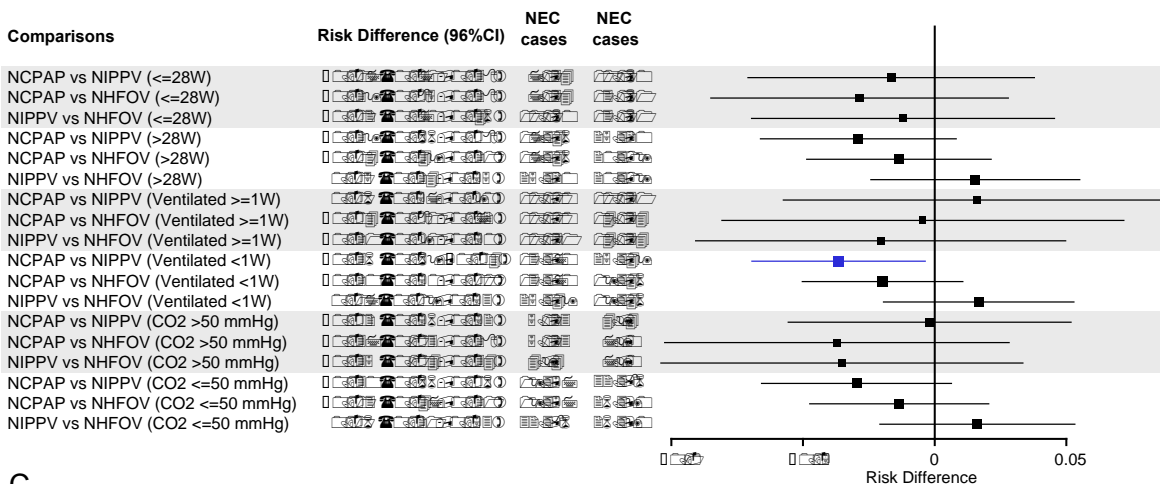

**C**

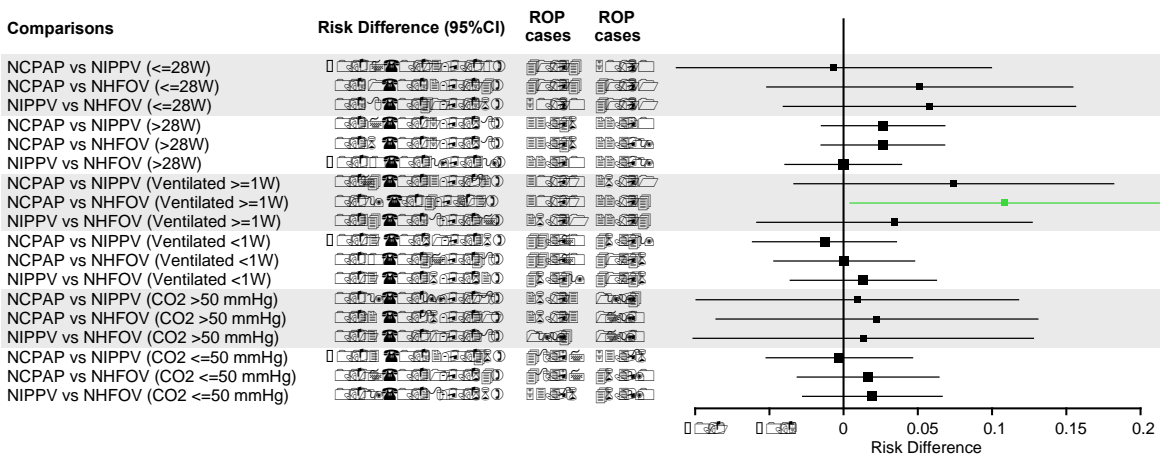

**eFigure 7. Secondary Outcomes: Duration of Oxygen Supplementation (A) and of Study Intervention (B).**

Subgroups of interest are highlighted with a grey background, alternate subgroups have no background. Both outcomes are measured in days. Data are shown as mean difference and 95% confidence interval. Data are illustrated as Forrest plots per each subgroup. Squares and lines indicate the mean differences and their 95% confidence interval, respectively. Square size is proportional to the subgroup numerosity. Green and red lines indicate comparisons significantly in favor of NHFOV and NCPAP, respectively. **Abbreviations:** CI: confidence interval; NCPAP: nasal continuous positive airway pressure; NHFOV: non-invasive high-frequency oscillation ventilation; NIPPV: noninvasive positive pressure ventilation.

**A**

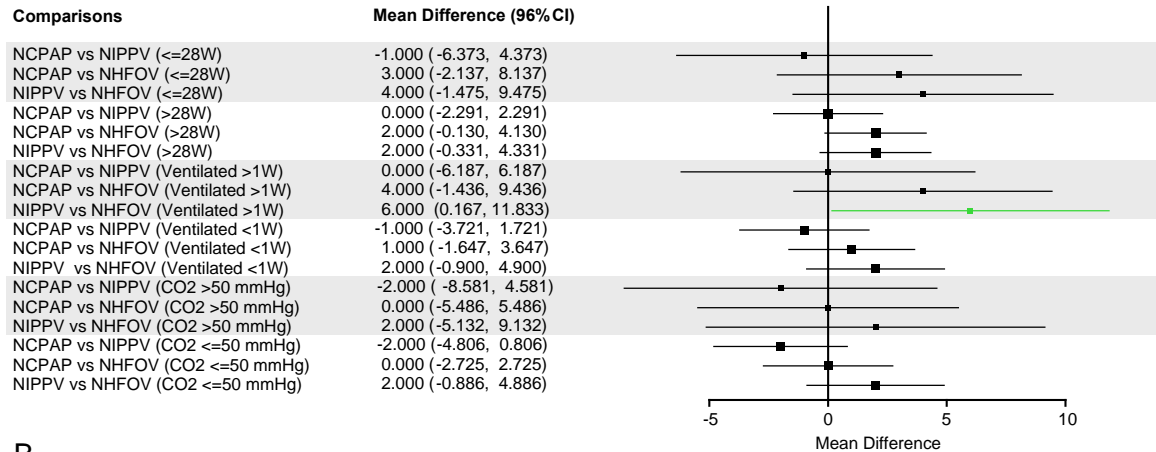

**B**

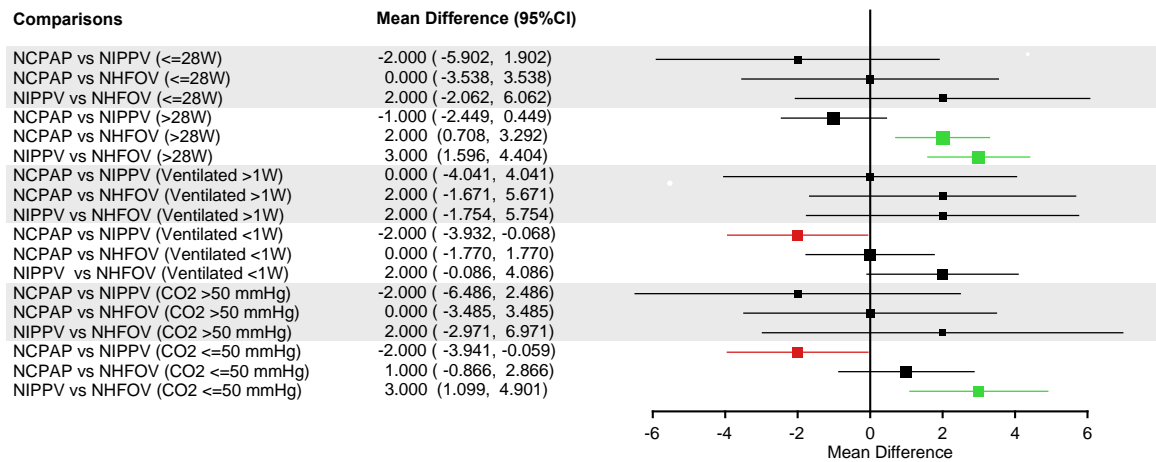

Supplement: jamanetwopen-e2321644-s002.pdf [file jamanetwopen-e2321644-s002.pdf]
