# Supplementary material for: Effectiveness of Nasal Continuous Positive Airway Pressure vs Nasal Intermittent Positive Pressure Ventilation vs Noninvasive High-Frequency Oscillatory Ventilation as Support After Extubation of Neonates Born Extremely Preterm or With More Severe Respiratory Failure: A Secondary Analysis of a Randomized Clinical Trial
Source: PubMed Central journal article supplement (PMC10318479; doi:10.1001/jamanetworkopen.2023.21644), 2023-07-03
Supplement: jamanetwopen-e2321644-s001.pdf [file jamanetwopen-e2321644-s001.pdf]

1 Protocol title:

2 **Noninvasive high frequency oscillation**  
3 **ventilation (NHFOV) vs continuous positive**  
4 **airway pressure (CPAP) vs noninvasive**  
5 **positive pressure ventilation (NIPPV) as**  
6 **post-extubation respiratory support in**  
7 **preterm neonates: a multicenter**  
8 **randomized trial.**

9

10 Protocol identifying number: Clinical Trials.gov NCT02570217

11 Local number: N.3.0 (last version)/ date: Nov 15/2017

12

13 Principal Investigator: Prof. Yuan Shi

14 Children's Hospital of Chongqing Medical University, Ministry of

15 Education Key Laboratory of Child Development and Disorders,

16 Key Laboratory of Pediatrics, Chongqing, China

17

18

19

20

21

22

23

24

25

26

---

## BACKGROUND

27

28       Respiratory distress syndrome (RDS) is the main cause of  
29       respiratory failure in preterm neonates, its incidence varying from ≈80%  
30       to ≈25% depending on gestational age.<sup>1</sup> When optimal prenatal care is  
31       provided, the best approach to treat RDS, according to several recent  
32       trials,<sup>2,3</sup> consists in providing continuous positive airway pressure  
33       (CPAP) from the first minutes of life using short binasal prongs or  
34       masks,<sup>4,5</sup> followed by early selective surfactant administration for  
35       babies with worsening oxygenation and/or increasing work of breathing.  
36       Any effort should be done to minimize the time under invasive  
37       mechanical ventilation (IMV).<sup>6</sup> Nonetheless, clinical trials have shown  
38       that a relevant proportion of preterm neonates fails this approach and  
39       eventually need IMV.<sup>7,8,9</sup> The duration of IMV is a well known risk factor  
40       for the development of broncho-pulmonary dysplasia (BPD) - a  
41       condition associated with significant morbidity and mortality.<sup>10,11</sup>

42       To minimize the duration of IMV, various non invasive respiratory  
43       support modalities are available in neonatal intensive care units (NICU).  
44       CPAP is presently the most common technique used in this regard.  
45       However, a systematic review has shown that non-invasive positive  
46       pressure ventilation (NIPPV) reduces the need for IMV (within one  
47       week from extubation) more effectively than NCPAP, although it is not  
48       clear if NIPPV may reduce need for intubation longterm and it seems to  
49       have no effect on BPD and mortality.<sup>12</sup> NIPPV main drawback is the

---

50 lack of synchronization, which is difficult to be accurately achieved and  
51 is usually unavailable. A more recent alternative technique is  
52 non-invasive high frequency oscillatory ventilation (NHFOV) which  
53 consists on the application of a bias flow generating a continuous  
54 distending positive pressure with oscillations superimposed on  
55 spontaneous tidal breathing with no need for synchronization. The  
56 physiological, biological and clinical details about NHFOV have been  
57 described elsewhere.<sup>13</sup>

58 To date, there is only one small observational uncontrolled study  
59 about the use of NHFOV after extubation in preterm infants.<sup>14</sup> Other  
60 relatively small case series or retrospective cohort studies suggested  
61 safety, feasibility and possible usefulness of NHFOV and have been  
62 reviewed elsewhere.<sup>13</sup> The only randomized trial published so far  
63 compared NHFOV to biphasic CPAP, in babies failing CPAP<sup>15</sup> and it  
64 has been criticized for methodological flaws and for not taking into  
65 account respiratory physiology.<sup>16</sup> An European survey showed that,  
66 despite the absence of large randomized clinical trials, NHFOV is quite  
67 widely used, at least in some Countries and no major side effects are  
68 reported, although large data about NHFOV safety are lacking.<sup>17</sup> This  
69 may be due to the relative NHFOV easiness of use but evidence-based  
70 and physiology-driven data are warranted about this technique.

71 NHFOV should theoretically provide the advantages of invasive  
72 high frequency oscillatory ventilation (no need for synchronization, high

---

73 efficiency in CO<sub>2</sub> removal, less volume/barotrauma) and nasal CPAP  
74 (non-invasive interface, oxygenation improvement by the increase in  
75 functional residual capacity through alveolar recruitment). NHFOV  
76 should allow to increase mean airway pressure (Paw) avoiding gas  
77 trapping and hypercarbia, thanks to the superimposed high frequency  
78 oscillations. Therefore, NHFOV is more likely to be beneficial for those  
79 neonates requiring high distending pressure to open up their lungs,  
80 such as babies at high risk of extubation failure due to severity of their  
81 lung disease. This may also be the case of extremely preterm,  
82 BPD-developing neonates who have increased airway resistances,  
83 while they are subjected to a deranged alveolarization and lung growth.  
84 Neonates presenting with respiratory acidosis may also benefit from  
85 NHFOV. Several animal and bench studies investigated the physiology  
86 and peculiarities of NHFOV<sup>13</sup> and these data should be used to  
87 conduct a physiology-guided trial in order to avoid errors done in the  
88 early trials about invasive high frequency ventilation.<sup>16</sup>

89 This study will be the first large trial aiming to compare CPAP vs  
90 NIPPV vs NHFOV in preterm neonates after surfactant replacement  
91 and during their entire NICU stay, to reduce the total need of invasive  
92 ventilation. Since there is a lack of formal data regarding NHFOV safety,  
93 some safety outcomes will also be considered. Specific subgroup  
94 analysis will be conducted for pre-specified groups of patients who may  
95 most likely benefit from NHFOV, according to the above-described

---

96 physiological characteristics.

97

98

### **OBJECTIVES**

99 To test whether NHFOV is more efficacious than CPAP or NIPPV,  
100 as post-extubation respiratory support, to reduce the need for IMV all  
101 along their NICU stay in neonates born between 25 and 32-weeks'  
102 gestation.

103

104

105

106

---

107 *INTENTIONALLY LEFT BLANK*

---

108

109

110

111

112

---

## METHODS

113

### *1. Trial design*

114

115 This will be a **blinded, multi-center, three-arms, parallel,**  
116 **randomized, controlled trial with a superiority design,** conducted in  
117 China. Since safety data will also be analyzed it may be considered a  
118 **phase II/III** trial. Since the trial will enroll all eligible patients irrespective  
119 of their lung mechanics/physiopathology and eligibility will be judged on  
120 the basis of simple clinical data commonly used in NICU daily care, it  
121 may be considered a **pragmatic** trial.<sup>18</sup> Conversely, since subgroup  
122 analyses will be performed on patients defined according to their actual  
123 lung physiopathology, they should be considered **explanatory**  
124 **subgroup analyses.**<sup>18</sup> Results of subgroup analyses will anyway need  
125 confirmation in future, specifically designed trials. A total of 69 NICUs  
126 are included in this trial (**Fig.1 and appendix**). All these NICUs belong  
127 to 30 provinces or cities or autonomous regions of Chinese mainland  
128 (apart from Tibet which has been excluded for the too high altitude).  
129 The trial has been designed with the collaboration of international  
130 investigators experts in NHFOV and noninvasive respiratory support  
131 composing the international advisory board.

132

133

134

135



---

152 cmH<sub>2</sub>O;<sup>6</sup> **d.** FiO<sub>2</sub>≤0.30; **e.** sufficient spontaneous breathing effort, as  
153 per clinical evaluation<sup>20</sup>).

154

### 155 **3. Exclusion criteria**

156 Neonates who never needed intubation and IMV are not eligible  
157 for the study; similarly, a neonate randomized but never extubated is  
158 not eligible in the study. Moreover, neonates with at least one of the  
159 following criteria are also not eligible: (1) major congenital anomalies or  
160 chromosomal abnormalities; (2) neuromuscular diseases; (3) upper  
161 respiratory tract abnormalities; (4) need for surgery known before the  
162 the first extubation; (5) Grade IV-intraventricular haemorrhage (IVH)  
163 occurring before the first extubation;<sup>21</sup> (6) congenital lung diseases or  
164 malformations or pulmonary hypoplasia; (7) birth weight <600 grams.

### 165 **4. Randomization**

166 **Neonates will be randomized and assigned either to CPAP,**  
167 **NIPPV or NHFOV arms with a 1:1:1 ratio, when patients fulfil all**  
168 **inclusion criteria and extubation is deemed imminent (anyway**  
169 **within 1h). Randomization cannot be done earlier.** Simple  
170 randomization will be done according to a computer-generated random  
171 number table and will be posted in a specific secured website available  
172 on 24/7. Twins will all be allocated in the same treatment group.  
173 **Infants randomized to one arm cannot crossover to the other or**  
174 **vice-versa during the study. Patients will remain under the**



175 **assigned respiratory support until the weaning criteria (see below)**  
176 **will be met. In case of intubation, when the baby will be extubated,**  
177 **he will receive again his original treatment according to**  
178 **randomization. This can be summarized by Fig.2.**

179

180 **Figure 2. Study design.** Neonates will stay on the assigned  
181 intervention up to the final weaning. No cross-over allowed. In case of  
182 intubation, when the baby will be extubated, he will receive again his  
183 original treatment according to randomization.

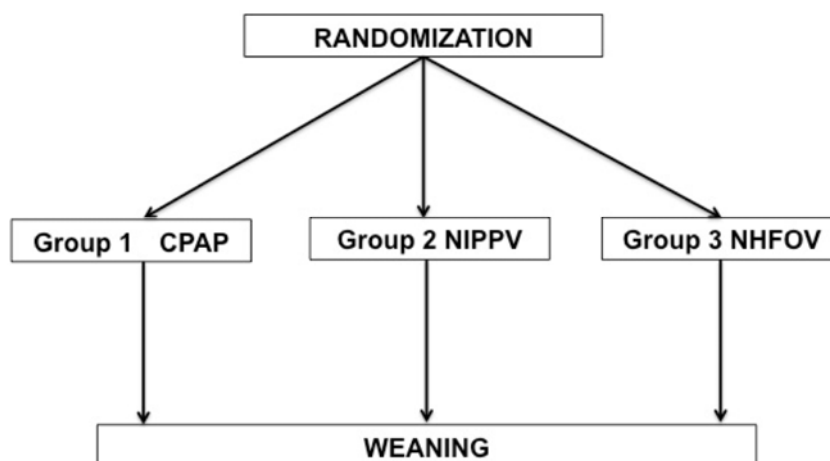

184

185

### 186 **5. Blinding**

187 Blinding towards the caregivers is impossible and blinding  
188 towards the patients makes no sense. **However, outcomes'**  
189 **assessors will be blinded, as endpoints will be recorded by**  
190 **investigators not involved in patients' care. An assessor per each**  
191 **participating NICU will be nominated. Moreover, investigators**

192 performing the final statistical analyses will be blinded to the  
193 treatment allocation, as data collected by assessors will be  
194 inserted in the dedicated website and the arms' allocation will be  
195 re-coded.

196

## 197 **6. Primary outcomes**

198 The primary outcomes will be: **(1) duration of IMV (in days); (2)**  
199 **ventilator-free days** (calculated as described in the appendix); **(3) the**  
200 **number of reintubation**. Neonates will be re-intubated if one of the  
201 following occurs:

202 **a.** severe respiratory acidosis (defined as  $\text{PaCO}_2 > 65$  mmHg with  
203  $\text{pH} < 7.2$ );

204 **b.** hypoxia refractory to study intervention (defined as  $\text{SpO}_2 < 90\%$ , with  
205  $\text{FiO}_2 = 0.4$  and maximal pressures allowed in the study arm – see below)  
206 for at least 4h;

207 **c.** severe apnoea (defined as recurrent apnoea with  $> 3$  episodes/h  
208 associated with heart rate  $< 100/\text{min}$  or a single episode of apnoea  
209 requiring bag and mask ventilation, or associated with  $\text{SpO}_2 < 85\%$  and  
210  $\text{FiO}_2 > 0.6$ );

211 **d.** pulmonary haemorrhage (defined as brightly blood tracheal  
212 secretion associated with sharp increase in oxygen and  $\text{Paw}$   
213 requirement and with occurrence of “white lungs”, new infiltrates or  
214 consolidations at the chest X-rays);

215 e. severe respiratory distress (defined as Silverman score >4) for at  
216 least 4h;

217 f. haemodynamic instability, defined as mean arterial pressure <10<sup>th</sup>  
218 percentile of appropriate nomograms<sup>22,23</sup> or anyway need of dopamine  
219 (if >5  $\mu$ /Kg/min) or dobutamine (if >5  $\mu$ /Kg/min) or any dose of  
220 noradrenaline, adrenaline, milrinone, nitric oxide or other pulmonary  
221 vasodilators.

222 g. cardio-respiratory arrest.

### 223 **7. Secondary outcomes**

224 The secondary outcomes will be: **(1) airleaks** (pneumothorax  
225 and/or pneumomediastinum) occurred *after* the extubation; **(2) BPD**,  
226 defined according to the NICHD definition (more details in the  
227 appendix);<sup>24</sup> **(3) haemodynamically significant patent *ductus***  
228 ***arteriosus* (PDA)**, defined according to local NICU protocols; **(4)**  
229 **retinopathy of prematurity (ROP) > 2<sup>nd</sup> stage;**<sup>25</sup> **(5) necrotizing**  
230 **enterocolitis (NEC)  $\geq$  2<sup>nd</sup> stage;**<sup>26</sup> **(6) IVH>2<sup>nd</sup> grade;**<sup>21</sup> **(7) need for**  
231 **postnatal steroids; (8) in-hospital mortality; (9) composite**  
232 **mortality/BPD; (10) Weekly weight gain (in grams/day) for the first**  
233 **4 weeks of life or until NICU discharge, whichever comes first.**

### 234 **8. Safety outcomes**

235 The safety outcomes will be the following: **(1) weekly number of**  
236 **vomiting** per day; **(2) weekly volume of gastric residual (ml/day); (3)**  
237 **weekly number of apnoeas** per day; **(4) nasal skin injury** (weekly

238 defined by a clinical score<sup>27</sup> as: 0 (zero, absence of injury), stage I  
239 (non-blanching erythema), stage II (superficial erosion), stage III  
240 (necrosis of full thickness of skin) – more details in the appendix).

241 **These outcomes will be averaged over each week for the first 4**  
242 **weeks of life or until NICU discharge, whichever comes first.**

243 Finally, **(5) Premature Infant Pain Profile score<sup>28</sup>** will be considered  
244 (averaged from values available in the first 48h from the allocation to  
245 CPAP, NIPPV or NHFOV).

246 ***9. Standard protocol approvals, registrations, and patient***  
247 ***consents***

248 The study was approved by the Ethics Committee of Daping  
249 Hospital (n.201721) and registered in the clinicaltrial.gov registry (ID:  
250 NCT03181958). The trial was performed in accordance with the  
251 approved guidelines and regulations of the participating institutions.  
252 Informed consent will be obtained antenatally or upon NICU admission  
253 from parents or guardians.

254 ***10. Study Intervention***

255 When the neonate had fulfilled the extubation criteria, this latter will  
256 took place with a gentle intratracheal suction, following local policies.  
257 Upper airways will then be suctioned and intervention will be started  
258 immediately as follows:

259 **10.1 Ventilators**

260 - **CPAP:** CPAP will be provided by either variable flow or continuous

261 flow devices, as there is no evidence that one type of CPAP  
262 generator would be better than any other.<sup>29</sup>

263 - **NIPPV:** NIPPV will be provided by any type of neonatal ventilator.

264 Synchronization will not be applied, as many currently marketed  
265 neonatal ventilators usually do not provide it for NIPPV.<sup>30</sup>

266 - **NHFOV:** NHFOV will only be provided with piston/membrane  
267 oscillators able to provide a real oscillatory pressure with active  
268 expiratory phase (that is, Acutronic FABIAN-III, SLE 5000,  
269 Loweinstein Med LEONI+, Sensormedics 3100A). Other machines  
270 providing high frequency ventilations will not be used.

271 Before the beginning of the study all ventilators will be checked to  
272 ensure that there is no malfunction.

## 273 **10.2 Interfaces**

274 CPAP, NIPPV and NHFOV will be all administered through short,  
275 low-resistance binasal prongs and/or nasal masks, since these are  
276 supposed to be the best in terms of resistive charge, leaks and/of  
277 comfort.<sup>4,5</sup> Nasal prongs size will be chosen according to the nares'  
278 diameter as the best fitting ones (the largest ones that fit the nares  
279 without blanching the surrounding tissues) and following  
280 manufacturer's recommendations. Nasal masks will also be  
281 appropriately sized according to manufacturer's recommendations.  
282 Alternating masks and prongs, according to clinical evaluation, is  
283 allowed in order to reduce the risk for nasal skin injury. Particular care

284 (e.g.: pacifiers, positioning, nursing) will be applied to reduce leaks and  
285 improve patients' comfort. These matters will be evaluated through a  
286 dedicated 30 min observation period when study intervention will be  
287 instigated. Non pharmacological sedation with pacifier and 33%  
288 glucose solution will be provided, when needed; no other sedation will  
289 be allowed. RAMCannula® are not allowed in the trial due to their  
290 resistive charge and their relevant pressure leaks.<sup>31,32</sup>

### 291 **10.3 Ventilatory management**

292 The three different respiratory supports will be managed as follows:

- 293 - **CPAP**: Neonates assigned to the CPAP group were initiated on a  
294 pressure of 5 cmH<sub>2</sub>O. CPAP can be raised in steps of 1 cmH<sub>2</sub>O up  
295 to 8 cmH<sub>2</sub>O. If this is not enough to maintain SpO<sub>2</sub> between 90%  
296 and 95%, FiO<sub>2</sub> will be added up to 0.40.
- 297 - **NIPPV**: neonates assigned to the NIPPV group will be started with  
298 the following parameters: **a)** positive end-expiratory pressure  
299 (PEEP) of 4 cmH<sub>2</sub>O (can be raised in steps of 1 cmH<sub>2</sub>O to max 8  
300 cmH<sub>2</sub>O, according to the oxygenation). **b)** Peak Inspiratory  
301 Pressure (PIP) of 15 cmH<sub>2</sub>O (can be raised in steps of 1 cmH<sub>2</sub>O to  
302 max 25 cmH<sub>2</sub>O, according to oxygenation, PaCO<sub>2</sub> levels and the  
303 chest expansion); maximal allowed FiO<sub>2</sub> will be 0.40 and SpO<sub>2</sub>  
304 targets will be 90-95%. **c)** inspiratory time (IT) will be 0.45 – 0.5 sec  
305 (according to clinicians' evaluation of leaks and the appearance of  
306 the pressure curve: a small pressure plateau is required and flow

307 may be set accordingly) and rate will be started at 30 bpm (can be  
308 raised in steps of 5 bpm to max 50 bpm, according to PaCO<sub>2</sub>  
309 levels).

310 - **NHFOV**: neonates assigned to NHFOV will be started with the  
311 following boundaries:

312 **a)** Paw of 10 cmH<sub>2</sub>O (can be changed in steps of 1 cmH<sub>2</sub>O within  
313 the range range 5-

314 16 cmH<sub>2</sub>O); Paw will be titrated (within the range) according to open  
315 lung strategy, performing alveolar recruitment, similar to what is done in  
316 endotracheal high frequency oscillatory ventilation (see **Fig.3**) targeting

317 a FiO<sub>2</sub> ≤ 25-30%.<sup>33</sup> Maximal allowed FiO<sub>2</sub> will be 0.40 and SpO<sub>2</sub> targets  
318 will be 90%-95%. **b)** frequency of 10Hz (can be changed in steps of

319 1Hz within the range 8-12Hz). **c)** Inspiratory time 50% (1:1).<sup>34</sup> **d)**

320 amplitude 25 cmH<sub>2</sub>O (can be changed in steps of 5 cmH<sub>2</sub>O within the  
321 range 25-50 cmH<sub>2</sub>O);<sup>34,35</sup> amplitude will be titrated according to PaCO<sub>2</sub>.

322 It is not strictly necessary to have visible chest oscillations, as PaCO<sub>2</sub>  
323 elimination during NHFOV also occurs in the upper airway dead

324 space.<sup>36</sup> In case of hypercarbia, amplitude will be increased first and  
325 then frequency will be lowered (within the above-described ranges),

326 however, if nasal masks are used amplitude should be kept at the  
327 maximum and PaCO<sub>2</sub> controlled by frequency titration, as the CO<sub>2</sub>

328 elimination using nasal masks seems inferior.<sup>37</sup>

329

330 INTENTIONALLY LEFT BLANK

331

332 **Figure 3. Alveolar recruitment according to the open lung strategy,**

333 **as described in<sup>33</sup>.** This should be followed in NHFOV arm, and

334 repeated as per clinical need within the suggested mean airway

335 pressure boundaries (5-16 cmH<sub>2</sub>O, with changes in steps of 1 cmH<sub>2</sub>O).

336 [Courtesy of Prof. A. van Kaam and Prof. D. De Luca].

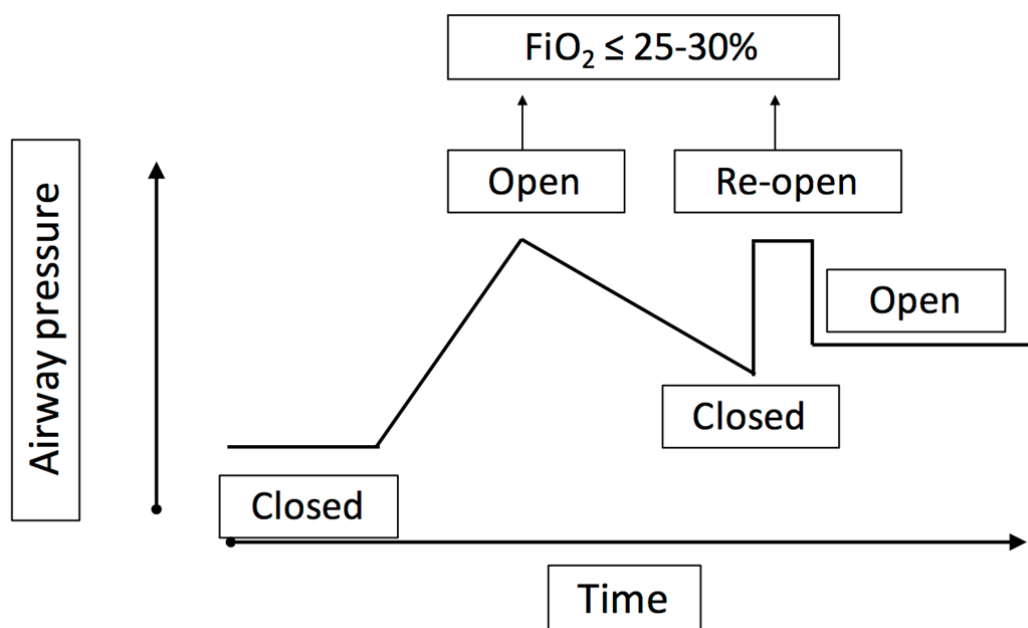

337

338

#### 339 10.4 Monitoring and concurrent treatments/diagnostic

##### 340 measures

341 PaCO<sub>2</sub> will be monitored using arterialized capillary blood gas analysis

342 and/or transcutaneous monitors according to local policies.

343 Transcutaneous monitoring will be performed according to the

344 American Association of Respiratory Care guidelines<sup>19</sup> and the



345 manufacturer's recommendations. Frequency of blood gas analysis will  
346 be decided by the attending clinicians. All neonates will be continuously  
347 monitored for SpO<sub>2</sub>, ECG, heart and respiratory rate. To avoid  
348 abdominal distention, a feeding tube will be placed in the stomach  
349 through the mouth and gas will periodically aspirated according to  
350 nurses' evaluation in all study arms.

351 Moreover, the following treatments or tests will be provided:

- 352 • Heart ultrasound to evaluate cardiac morphology, pulmonary  
353 pressures and PDA, within the first 3 days of life and subsequently  
354 repeated, if needed.
- 355 • Cerebral ultrasound within 48 hours of life and weekly thereafter,  
356 until discharge, if needed.
- 357 • Routine measures to prevent BPD; routine fluid/nutritional policy;  
358 routine caffeine therapy.
- 359 • Placement of umbilical central venous catheter and/or peripherally  
360 inserted central venous lines. Placement of arterial lines if needed,  
361 according to local policies.
- 362 • Routine therapies according to local policies (i.e.: antibiotics, PDA  
363 closure drugs...).

364 In general, routine clinical assistance and nursing will not be  
365 changed because of the study, out of the trial intervention; the clinical  
366 assistance will be identical in the three study arms. No additional blood  
367 samples are required for this study.

368

369 **10.5 Weaning from study interventions**

370 The study intervention will be progressively weaned, according to  
371 clinical evaluation and respecting the following guidelines:

372 ○ in the CPAP arm, pressure will be reduced by 1 cmH<sub>2</sub>O steps down  
373 to a minimum of 3 cmH<sub>2</sub>O;

374 ○ in the NIPPV arm, PIP and PEEP will be reduced by 1 cmH<sub>2</sub>O steps  
375 down to a minimum of 3 and 5 cmH<sub>2</sub>O, respectively. Similarly,  
376 frequency will be reduced to a minimum level of 20 bpm in steps of 5  
377 bpm.

378 ○ in the NHFOV arm, amplitude will be reduced to the minimum initial  
379 level of 20 cmH<sub>2</sub>O and Paw will be reduced by 1 cmH<sub>2</sub>O down to a  
380 minimum of 3 cmH<sub>2</sub>O.

381 The study intervention (CPAP, NIPPV or NHFOV) will be stopped  
382 when the above-described minimum parameters are reached and  
383 maintained for at least 48h with the following: (1) FiO<sub>2</sub> ≤0.25; (2)  
384 Silverman score <3; (3) no apnoeas or bradycardia without  
385 spontaneous recovery. If a baby will desaturate (SpO<sub>2</sub> <85% with  
386 FiO<sub>2</sub>>25%) or has relevant dyspnoea (Silverman ≥3) or more than 3  
387 apnoeas/day the intervention (CPAP, NIPPV or NHFOV) will be  
388 restarted for at least 48h and then re-evaluated. The end of study  
389 intervention may occur at any time during hospitalization if the above  
390 described criteria are met. When study interventions end, the neonate

391 may be placed under low flow oxygen therapy (max 1 L/min), if needed,  
392 according to clinicians' evaluation and local policies. Anyway, when a  
393 post-conceptual age of 36 weeks is reached, if the patient still needs  
394 noninvasive respiratory support, he/she will be shifted to CPAP and  
395 managed according to clinical evaluation and local policies.

### 396 **11. End of the study**

397 A patient may exit from the study for any of the following reasons:

- 398 1. Death.
- 399 2. In any case, when the 36 weeks' post-conceptual age is reached.
- 400 3. If parents or guardians withdraw an already given consent for the  
401 participation (in that case the patient will keep receiving the whole  
402 routine clinical assistance; data acquired up to that point will be  
403 immediately destroyed).

### 404 **12. Sample size calculation**

405 It is difficult to calculate a sample size, since this is the first to  
406 investigate CPAP vs NIPPV vs NHFOV in post-extubation phase in  
407 preterm babies. However, a previous prospective, cohort,  
408 non-randomized, pilot study comparing post-extubation NIPPV and  
409 NHFOV in preterm neonates provides data about the primary outcome  
410 "duration of mechanical ventilation". This study showed a reduction of  
411  $\approx 30\%$  for babies receiving NHFOV, as compared to those treated with  
412 NIPPV.<sup>38</sup> A randomized trial of NIPPV vs CPAP by Ramanathan et al.  
413 showed a similar reduction.<sup>39</sup> Since these trials have not the same

414 design of ours, we decide to be more prudent and we aimed a  
415 difference of 20% in the duration of mechanical ventilation. Considering  
416 an alpha-error of 0.05 (with a Bonferroni correction at 0.017) and a  
417 power of 95%, 480 neonates should be enrolled in each arm (with a  
418 1:1:1 design). Thus, a total of at least 1440 neonates will be enrolled.  
419 Sample size calculation has been performed with GPower 3.1.9.3.<sup>40</sup>

### 420 **13. Data collection**

421 All data for trial analysis are routine clinical items that can be  
422 obtained from the clinical notes. Data will be recorded in real time  
423 (every day) on web-based case report forms provided by OpenCDMS.  
424 The website will be tested with fictitious data before the actual  
425 enrolment. Data will be entered by an assessor per each center.  
426 Assessors will be research nurses or local investigators blinded to the  
427 study intervention, as they are not involved in patients' care. Access to  
428 the form will be password protected and participants will be identified  
429 by trial number only. Clinical information will be collected at the  
430 following time-points:

431 **Before the intervention begins:** information on eligibility;  
432 baseline clinical informations, respiratory diagnosis, critical risk index  
433 for babies-II (CRIB-II) score.<sup>41</sup>

434 **Following study intervention:** ventilator parameters, SpO<sub>2</sub>, blood  
435 gas values before the extubation if available (it is suitable to have at least  
436 transcutaneous blood gas values). PaO<sub>2</sub>, PaCO<sub>2</sub>, SpO<sub>2</sub> and pH between

437 6h and 24h from the extubation.

438 **Follow-up:** NICU length stay, duration of IMV, number of  
439 reintubation, ventilator free days, duration of oxygen therapy, duration of  
440 the study intervention (CPAP, NIPPV or NHFOV), airleaks, PDA, BPD,  
441 ROP >2<sup>nd</sup> stage, NEC≥2<sup>nd</sup> stage, IVH>2<sup>nd</sup> grade, need for postnatal  
442 steroids, in-hospital mortality, composite mortality/BPD, weekly weight  
443 gain (in grams/day) for the first 4 weeks of life or until NICU discharge,  
444 whichever comes first. Moreover, the following safety data will be  
445 recorded: weekly number of vomiting per day, weekly volume of gastric  
446 residual (ml/day); weekly number of apnoeas per day; nasal skin injury  
447 (weekly defined by a 1-2-3 clinical score<sup>24</sup> – more details in the appendix).  
448 These outcomes will be averaged over each week for the first 4 weeks of  
449 life or until NICU discharge, whichever comes first. Finally, the Premature  
450 Infant Pain Profile score<sup>25</sup> recorded in the first 48h from the allocation will  
451 be recorded. Abdominal circumference at 48h and 96h from the  
452 instigation of CPAP, NIPPV or NHFOV will also be recorded.

#### 453 **14. Statistics**

454 Data analysis will be performed blindly to the type of treatment  
455 received. An *intention-to-treat* analysis will be applied. An *interim*  
456 analysis will be performed at 50% of the enrolment. First, data will be  
457 checked for normality using Kolmogorov-Smirnov test and results will be  
458 presented as odds ratio (OR) and 95% confidence interval (CI) or  
459 adjusted OR and 95%CI, and mean ± standard deviation or median

460 (quartiles), as appropriate. ANOVA and Mann-Whitney test will be  
461 applied, according to data distribution. Proportions will be tested using  
462  $\text{Chi}^2$  or Fisher tests, as appropriate.

463 If required, according to type of variable and their distributions,  
464 logistic or linear regressions will be performed. Multivariate regressions  
465 will also be performed for selected outcomes if needed (that is, if a  
466 baseline characteristic of the enrolled population differs between the two  
467 arms with a  $p < 0.2$  at the univariate analysis, then the results will be  
468 adjusted for that variable). In that case analysis of multicollinearity will be  
469 previously performed considering condition index of Eigenvalues and  
470 variables inserted in the model will have to carry a Variance Inflation  
471 Factor  $< 2$ .<sup>42,43</sup>  $p$ -values  $< 0.05$  will be considered statistically significant.

472 The following sub-group analysis will be performed:

- 473- 1. Subgroup analysis for **babies  $\leq 28$  weeks' gestation.**
- 474- 2. Subgroup analysis for **babies who have been invasively ventilated**  
475 **for at least 1 week from birth.**
- 476- 3. Subgroup analysis for babies with  **$\text{PaCO}_2 > 50$  mmHg before the**  
477 **extubation or at the 6h or 24h after extubation.**

#### 478 ***15. Data Monitoring Board (DMB)***

479 Dr. Dezhi Mu, Professor of Pediatrics, West China Second University  
480 Hospital, Sichuan University, Chengdu, Sichuan.

481 Dr. Mingyan Hei, Professor of Neonatal Centre, Beijing Children's  
482 Hospital, Capital Medical University, Beijing National Centre for

---

483 Children's Health, Beijing, China.

484 Dr. Lyv Deliang, Shenzhen Centre for chronic disease control.

485 Dr. Lyv Deliang served as a consultant for the statistical analyse

486 **16. *International advisory panel***

487 International colleagues were consulted for the protocol preparation, the  
488 training on trialed respiratory support techniques and technical problems that  
489 may arise during the study. They will also be able to analyze data in the *interim*  
490 analysis at approximately 50% of the trial enrolment. The panel will  
491 be composed by international neonatologists or pediatric intensivists experts in  
492 respiratory care. This is unusual in a trial about neonatal ventilation but will  
493 help to increase the quality of data. The board will advice the principal  
494 investigator (YS) who will remain the only complete responsible for any aspect  
495 of the trial.

496

---

497 *INTENTIONALLY LEFT BLANK*

---

498

---

## ETHICAL CONSIDERATIONS

499

500 This trial is worth to be conducted given the uncertainty about the effectiveness  
501 of the different respiratory support techniques tested. Moreover, NHFOV might  
502 be actually superior to the other techniques, as we may hypothesize from the  
503 currently available data. In detail, many different types of noninvasive  
504 respiratory support are now available and we do not know yet which is the best  
505 policy to be applied especially in the babies at highest risk, (i.e.: in those  
506 developing BPD). NHFOV has been already studied in preliminary cross-over  
507 trials, in bench and animal studies,<sup>13</sup> while invasive HFOV is routinely used for  
508 severe respiratory failure worldwide. NIPPV has been studied in several  
509 randomized controlled trials enrolling smaller population and/or without triple  
510 comparison against CPAP and NHFOV. Thus, there is actually a great drive  
511 towards non-invasive ventilation, especially for preterm neonates, and this  
512 study is a new step within this framework.

513 Thus, the risks for babies are minimized and the monitoring will report quickly  
514 any problem, if any. Out of the studied intervention, the participation to the  
515 study will not change in any way the routine clinical assistance set for every  
516 patient. Data will be recorded anonymously and will be secured and accessible  
517 only to the investigators and to the parents/guardians of the enrolled patients.  
518 Data of a specific patient will be immediately destroyed if an already given  
519 consent is withdrawn. In no case the recorded data will be used for purposes  
520 out of those specified in the trial protocol. Moreover, the trial is only funded by a  
521 public Chinese research program, thus it will not have external industrial



522 influences and has the merit to try filling the lack of public funding for neonatal  
523 ventilation trials.<sup>44</sup>

524

525

526

---

527 *INTENTIONALLY LEFT BLANK*

---

528

529

530

531

532

533

## APPENDIX

534

### A1. CLARIFICATIONS FOR EXCLUSION CRITERIA

535 Neonates who never needed intubation and IMV are not eligible for the  
536 study; similarly, a neonate randomized but never extubated is not  
537 eligible in the study. This means that, if a randomized neonate is not  
538 actually extubated within 1 hour because there has been a worsening  
539 of his conditions or death, he is excluded the study. **Randomization**  
540 **must be done as close as possible to the extubation, once all**  
541 **inclusion criteria are fulfilled (see above), and anyway within 1h**  
542 **from the actual extubation.**

543 **1. Some exclusion criteria are represented by congenital**  
544 **disorders: when a patient is affected by these disorders his**  
545 **biology and physiology are significantly changed and are not**  
546 **eligible for the study and will not be randomized. If the**  
547 **condition has been discovered/suspected after the**  
548 **randomization but before the study inclusion (that is, before**  
549 **extubation), they will not receive the study intervention and**  
550 **will not entry in the study. If one of these conditions is**  
551 **diagnosed after the inclusion in the study, the neonate will be**  
552 **excluded *a posteriori*.** This is the case of neonates with major  
553 congenital anomalies, chromosomal abnormalities, neuromuscular  
554 diseases, congenital upper respiratory tract abnormalities and  
555 congenital lung diseases or malformations or hypoplasia. Examples  
556 of these conditions are: genetic syndromes, surfactant protein  
557

---

558 defects, congenital adenomatous pulmonary malformations,  
559 congenital diaphragmatic hernia or sequestration, congenital  
560 hypoventilation syndrome, pulmonary hypoplasia or any metabolic  
561 disease.

562 **2. Same applies for the need for surgery anticipated antenatally**  
563 **or before the first extubation, as this is usually related to**  
564 **congenital malformations. These neonates are not eligible for**  
565 **the study and will not be randomized. If the condition has been**  
566 **discovered/suspected after the randomization but before the**  
567 **study inclusion (that is, before extubation) they will not receive**  
568 **the study intervention and will not entry in the study. If a**  
569 **surgery will be needed later during the NICU hospitalization for**  
570 **other reasons (for instance for PDA ligation or NEC), the**  
571 **patient will regularly continue the trial. Conditions needing**  
572 **surgery will be noticed in the web-based database.**

573 **3. Grade IV-IVH known before the first extubation is a significant**  
574 **risk factor for prognosis and for quality of life. Continuing the**  
575 **NICU care in this situation may be considered unethical,**  
576 **depending to different local settings, cultures, ethical and**  
577 **religious beliefs. This may significantly impact on the trial**  
578 **outcomes. These neonates are not eligible for the study and**  
579 **will not be randomized. If grade IV-IVH has been**  
580 **discovered/suspected after the randomization but before the**  
581 **study inclusion (that is, before extubation), they will not**  
582 **receive the study intervention and will not entry in the study. If**  
583 **Grade IV-IVH will be diagnosed after the study inclusion, the patient**

584 will continue the study regularly and this will be noticed amongst the  
585 outcomes.

586 **A2. LIST OF STUDY DEFINITION/ASSESSMENTS (IN**  
587 **ALPHABETICAL ORDER)**

588 - **Antenatal steroids.** Antenatal steroid prophylaxis will be  
589 considered complete if two 12 mg-doses of betamethasone 24h  
590 apart and between 1 day and 7 days before the delivery had been  
591 given.

592 - **Blood gas analysis.** Blood gas values may only be obtained in  
593 following three ways (venous blood gas analysis is not allowed in  
594 the study).

595 **Arterial blood from indwelling arterial lines**, if one of these was  
596 placed for clinical reasons. As these are likely to be unavailable in the  
597 majority of cases, the following two alternative techniques may be  
598 used.

599 **Arterialized capillary blood** gas analysis is performed, warming a  
600 patient's heel for 10 minutes and collecting 200 µL of blood into a  
601 heparinized micro-tube. This must be analyzed by a blood gas analyzer  
602 within 5 minutes. Blood gas analysis will be obtained upon attending  
603 neonatologist decision.

604 **Transcutaneous blood gas monitoring** will be performed according  
605 to American Associations of Respiratory Care guidelines<sup>19</sup> and the  
606 device manufacturer's recommendations and using an electrode  
607 temperature of 44 °C for a short time (max 10-15min). Particular care  
608 must be provided to avoid skin injury in extremely preterm neonates: in  
609 some cases, a temperature of 42°C may be more suitable.

610 - **BPD definition as per NICHD definition (for neonates  $\leq 32$**   
 611 **weeks' gestation)**<sup>24</sup>

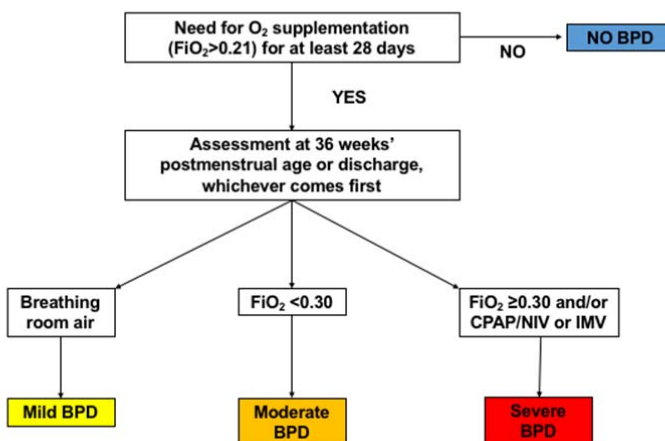

612

613 - **Clinical Risk Index for Babies (CRIB-II) score.**<sup>41</sup> This is an  
 614 estimator of the clinical severity at the NICU admission. CRIB-II  
 615 score considers 4 variables: *birth weight, GA, base excess within*  
 616 *the 1<sup>st</sup> hour of life and temperature at the admission* (see below as  
 617 reproduced from <sup>41</sup>). An online calculator is available at  
 618 [www.sfar.org/scores2/crib22.php](http://www.sfar.org/scores2/crib22.php)

Birthweight (g) and gestation (weeks):  
 The maximum (worst) score for birthweight and gestation is 15, which is obtained for a 22 week male infant of less than 501 g birthweight

| Male infants      |  |  |  |  |  |  |  |  |  |  | Female infants    |  |  |  |  |  |  |  |  |  |  |
|-------------------|--|--|--|--|--|--|--|--|--|--|-------------------|--|--|--|--|--|--|--|--|--|--|
| Birthweight (g)   |  |  |  |  |  |  |  |  |  |  | Birthweight (g)   |  |  |  |  |  |  |  |  |  |  |
| 2751 to 3000      |  |  |  |  |  |  |  |  |  |  | 2751 to 3000      |  |  |  |  |  |  |  |  |  |  |
| 2501 to 2750      |  |  |  |  |  |  |  |  |  |  | 2501 to 2750      |  |  |  |  |  |  |  |  |  |  |
| 2251 to 2500      |  |  |  |  |  |  |  |  |  |  | 2251 to 2500      |  |  |  |  |  |  |  |  |  |  |
| 2001 to 2250      |  |  |  |  |  |  |  |  |  |  | 2001 to 2250      |  |  |  |  |  |  |  |  |  |  |
| 1751 to 2000      |  |  |  |  |  |  |  |  |  |  | 1751 to 2000      |  |  |  |  |  |  |  |  |  |  |
| 1501 to 1750      |  |  |  |  |  |  |  |  |  |  | 1501 to 1750      |  |  |  |  |  |  |  |  |  |  |
| 1251 to 1500      |  |  |  |  |  |  |  |  |  |  | 1251 to 1500      |  |  |  |  |  |  |  |  |  |  |
| 1001 to 1250      |  |  |  |  |  |  |  |  |  |  | 1001 to 1250      |  |  |  |  |  |  |  |  |  |  |
| 751 to 1000       |  |  |  |  |  |  |  |  |  |  | 751 to 1000       |  |  |  |  |  |  |  |  |  |  |
| 501 to 750        |  |  |  |  |  |  |  |  |  |  | 501 to 750        |  |  |  |  |  |  |  |  |  |  |
| 251 to 500        |  |  |  |  |  |  |  |  |  |  | 251 to 500        |  |  |  |  |  |  |  |  |  |  |
| Gestation (weeks) |  |  |  |  |  |  |  |  |  |  | Gestation (weeks) |  |  |  |  |  |  |  |  |  |  |

Temperature at admission (°C)

|              |   |
|--------------|---|
| ≤29.6        | 5 |
| 29.7 to 31.2 | 4 |
| 31.3 to 32.8 | 3 |
| 32.9 to 34.4 | 2 |
| 34.5 to 36   | 1 |
| 36.1 to 37.5 | 0 |
| 37.6 to 39.1 | 1 |
| 39.2 to 40.7 | 2 |
| >40.8        | 3 |

Base excess (mmol/L):

|            |   |
|------------|---|
| <-26       | 7 |
| -26 to -23 | 6 |
| -22 to -18 | 5 |
| -17 to -13 | 4 |
| -12 to -8  | 3 |
| -7 to -3   | 2 |
| -2 to 2    | 1 |
| >3         | 0 |

Sex, birthweight (g) and gestation (weeks): \_\_\_\_\_  
 Temperature at admission (°C): \_\_\_\_\_  
 Base excess (mmol/L): \_\_\_\_\_  
 Total CRIB II Score

The logistic regression equation relating CRIB II to mortality (CRIB II algorithm) is:  
 Log odds of mortality =  $G = -6.476 + 0.450 \times \text{CRIB II}$   
 Probability of mortality =  $\exp(G) / [1 + \exp(G)]$   
 The range of possible CRIB II scores is 0 to 27

619

Clinical risk Index for babies II (CRIB II) score

- 
- 620 - **Time on CPAP/NIPPV/NHFOV.** Number of days spent under these  
621 respiratory supports will be registered and rounded to the closest  
622 entire number.
- 623 - **Gestational age (GA).** GA is determined based on sure dates of  
624 last menstrual period or early ultrasound scan (within the first  
625 trimester). If a discrepancy of more than 2 weeks exists, the early  
626 ultrasound scan will be chosen.
- 627 - **Nasal injuries.** These are classified by using a clinical score<sup>26</sup> as  
628 stage I (non-blanching erythema), stage II (superficial erosion),  
629 stage III (necrosis of full thickness of skin) in the skin area in contact  
630 with nasal prongs (see below, as reproduced from<sup>27</sup>). The score will  
631 be 0 (zero), in case of absence of any injury.
- 632

633

634

635

636

---

637 *INTENTIONALLY LEFT BLANK*

---

638

639

640

641

642

- 643 - **Premature Infant Pain Profile (PIPP) score.<sup>28</sup> (see below,**  
 644 **reproduced from <sup>28</sup>)**

Table V – Premature Infant Pain Profile (PIPP)

| Indicators                     | 0                                                          | 1                                                    | 2                                                          | 3                                                       |
|--------------------------------|------------------------------------------------------------|------------------------------------------------------|------------------------------------------------------------|---------------------------------------------------------|
| GA in weeks                    | ≥ 36 weeks                                                 | 32 to 35 weeks and 6 days                            | 28 to 31 weeks and 6 days                                  | < 28 weeks                                              |
| Observe the NB for 15sec       |                                                            |                                                      |                                                            |                                                         |
| Alertness                      | Active<br>Awake<br>Opened eyes<br>Facial movements present | Quiet<br>Awake<br>Opened eyes<br>No facial movements | Active<br>Sleep<br>Closed eyes<br>Facial movements present | Quiet<br>Sleeping<br>Closed eyes<br>No facial movements |
| Record HR and SpO <sub>2</sub> |                                                            |                                                      |                                                            |                                                         |
| Maximal HR                     | ↑ 0 to 4 bpm                                               | ↑ 5 to 14 bpm                                        | ↑ 15 to 24 bpm                                             | ↑ ≥ 25 bpm                                              |
| Minimal Saturation             | ↓ 0 to 2.4%                                                | ↓ 2.5 to 4.9%                                        | ↓ 5 to 7.4%                                                | ↓ ≥ 7.5%                                                |
| Observe NB for 30 sec          |                                                            |                                                      |                                                            |                                                         |
| Frowned forehead               | Absent                                                     | Minimal                                              | Moderate                                                   | Maximal                                                 |
| Eyes squeezed                  | Absent                                                     | Minimal                                              | Moderate                                                   | Maximal                                                 |
| Nasolabial furrow              | Absent                                                     | Minimal                                              | Moderate                                                   | Maximal                                                 |

Absent is defined as 0 to 9% of the observation time; minimal, 10% to 39% of the time; moderate, 40% to 69% of the time; and maximal as 70% or more of the observation time. In this scale, scores vary from zero to 21 points. Scores equal or lower than 6 indicate absence of pain or minimal pain; scores above 12 indicate the presence of moderate to severe pain.

GA – Gestational Age. NB – Newborn.

645

- 646 - **Pulmonary hypoplasia.** This will be clinically defined if anamnestic  
 647 (prenatal findings: small lung volume), imaging (diffuse chest x-ray  
 648 opacity or hypo-density) and clinical data (extremely low gestational  
 649 age, oligo-anhydramnios, severe pulmonary hypertension) are  
 650 present. Pulmonary hypoplasia usually does not allow survival.
- 651 - **Respiratory main diagnosis. A respiratory main diagnosis that**  
 652 **required IMV (± surfactant administration) has to be given**  
 653 **according to the following criteria. RDS:** respiratory distress  
 654 appearing within the first 24 h of life, with complete, sustained, and  
 655 prompt response to surfactant or lung recruitment or both;  
 656 additional non-mandatory criteria are lung imaging (chest X-rays or  
 657 ultrasound, according to local policies) supporting the diagnosis or  
 658 lamellar body counts ≤30 000/mm<sup>3</sup>, or both.<sup>45</sup> **Pneumonia:**  
 659 broncho-alveolar lavage fluid or blood positive culture or C-reactive  
 660 protein and/or procalcitonin beyond the normal values, together with

661 radiological signs of infection (infiltrates and/or consolidation and/or  
662 loss of aeration).<sup>46</sup> **Sepsis (international pediatric sepsis  
663 definition):** presence of systemic inflammatory response syndrome  
664 (SIRS) together with a suspected or proven (by positive culture,  
665 tissue stain, or polymerase chain reaction test) infection caused by  
666 any pathogen OR a clinical syndrome associated with a high  
667 probability of infection.<sup>47</sup> Evidence of SIRS is given by the presence  
668 of at least two of the following four criteria, one of which must be  
669 abnormal temperature or leukocytes:

- 670 ▪ Core temperature  $>38.5^{\circ}\text{C}$  or  $<36^{\circ}\text{C}$ .
- 671 ▪ Tachycardia, defined as a mean heart  $>180$  bpm in the absence of  
672 external stimulus, chronic drugs, or painful stimuli; or otherwise  
673 unexplained persistent elevation over a 0.5- to 4-hr time period OR  
674 bradycardia, defined as a mean heart rate  $<100$  bpm in the absence  
675 of external vagal stimulus, -blocker drugs, or congenital heart  
676 disease; or otherwise unexplained persistent depression over a  
677 0.5-hr time period.
- 678 ▪ Mean respiratory rate  $>60/\text{min}$  or need for IMV for an acute process  
679 not related to underlying neuromuscular disease or the receipt of  
680 general anesthesia.
- 681 ▪ Leukocyte count elevated or depressed or 10% immature  
682 neutrophils.

683 Evidence of infection includes positive findings on anamnesis, clinical  
684 exam, imaging, or laboratory tests.<sup>48</sup> **Meconium aspiration syndrome  
685 (MAS):** presence meconium-stained amniotic fluid and secretions upon  
686 tracheal suctioning with onset of respiratory distress early from birth



---

687 and chest X-rays or lung ultrasound typical for MAS.<sup>48</sup> **Neonatal ARDS:**  
688 defined as per the international Montreux definition.<sup>45</sup>  
689 - **Ventilator free days (VFD)** defined as the number of days spent in  
690 the NICU without IMV. One point is given for each day during the  
691 NICU stay that patients are both alive and free of mechanical  
692 ventilation; as death, is the worst outcome a dead patient is given  
693 zero VFD.<sup>49</sup>

694

---

695 *INTENTIONALLY LEFT BLANK*

---

696

697

698

699

700

701

702

703

---

704 **A3. LIST OF DATA TO BE COLLECTED IN THE ELECTRONIC CRF**

705 ***Basic patients' data***

- 706 1. Sex (male/female).
- 707 2. Gestational age (weeks without decimals).
- 708 3. Birth Weight (g).
- 709 4. CRIB-II score<sup>41</sup> at the NICU admission (as described above or  
710 through the online calculator cited above).
- 711 5. Day of age at the first extubation (d).
- 712 6. Delivery type (Vaginal birth/Elective caesarean delivery/Emergency  
713 caesarean delivery).
- 714 7. Complete Antenatal steroids (yes/no – as defined above).
- 715 8. Apgar score at 1 and 5 min.
- 716 9. Surfactant given: (yes/no and which type of surfactant).
- 717 10. Surfactant dose (mg/kg).
- 718 11. Number of surfactant doses, if any (1,2,3).
- 719 12. Mean airway pressure (Paw) at the extubation (cmH<sub>2</sub>O).
- 720 13. FiO<sub>2</sub> and SpO<sub>2</sub> before extubation (% - right before extubation).
- 721 14. PaO<sub>2</sub> before extubation (mmHg – obtained as described above  
722 from the closest available measurement).
- 723 15. PaCO<sub>2</sub> before extubation (mmHg – obtained as described above  
724 from the closest available measurement).
- 725 16. pH before extubation (if available, obtained as described above  
726 from the closest available measurement).

727 17. Lactate before extubation (if available, obtained as described  
728 above from the closest available measurement).

729 18. Type of ventilation at the extubation (Conventional/HFOV).

730 19. Main early respiratory diagnosis  
731 (RDS/Pneumonia/Sepsis/ARDS/MAS...).

732 20. Main reason for re-intubation (if any).

733 **Outcomes**

734 1. Extubation failure at 48h (yes/no).

735 2. Paw (cmH<sub>2</sub>O), PaO<sub>2</sub> (mmHg), PaCO<sub>2</sub> (mmHg) and FiO<sub>2</sub> (%) between  
736 6 and 24h after extubation.

737 3. Duration of invasive ventilation (d).

738 4. Ventilator free-days (calculated as described above).

739 5. Number of re-intubations during the NICU stay (total number).

740 6. Duration of treatment (CPAP, NIPPV or NHFOV – d).

741 7. Duration of oxygen treatment (d).

742 8. Need for postnatal steroids (yes/no).

743 9. In-hospital mortality (yes/no).

744 10. Weekly weight gain (g/d) (averaged over each week for the first 4  
745 weeks of life or until NICU discharge, whichever comes first, as  
746 described above).

747 11. Air leaks after the extubation (yes/no).

748 12. BPD<sup>23</sup> (no/mild/moderate/severe – as described above).

749 13. haemodynamically significant PDA (diagnosed according to local

---

750 NICU protocols).

751 14. ROP >2<sup>nd</sup> stage.

752 15. NEC  $\geq$ 2<sup>nd</sup> stage.

753 16. IVH >2<sup>nd</sup> grade.

754 17. NICU length of stay (d).

755 18. Weekly number of vomiting per day (averaged over each week for  
756 the first 4 weeks of life or until NICU discharge, whichever comes first,  
757 as described above).

758 19. Weekly volume of gastric residual (ml/d) (averaged over each week  
759 for the first 4 weeks of life or until NICU discharge, whichever comes  
760 first, as described above).

761 20. Weekly number of apnoeas per day (averaged over each week for  
762 the first 4 weeks of life or until NICU discharge, whichever comes first,  
763 as described above).

764 21. Premature Infant Pain Profile score (averaged from the values  
765 available in the first 48h from the allocation, as described above).

766 22. Nasal skin injury (weekly defined by a 0-1-2-3 clinical score, as  
767 described above).

768 23. Abdominal circumference (cm) at 48h and 96h after study  
769 intervention.

770

771

772

---

**773 REFERENCES**

- 774 1. Lemons JA, Bauer CR, Oh W, Korones SB, Papile LA, Stoll BJ,  
775 Verter J, Temprosa M, Wright LL, Ehrenkranz RA, Fanaroff AA, Stark A,  
776 Carlo W, Tyson JE, Donovan EF, Shankaran S, Stevenson DK. Very  
777 low birth weight infant outcomes of the NICHD neonatal research  
778 network. *Pediatrics*. 2001;107: 1–8.
- 779 2. Schmölzer GM, Kumar M, Pichler G, Aziz K, O'Reilly M, Cheung PY.  
780 Non-invasive versus invasive respiratory support in preterm infants at  
781 birth: systematic review and meta-analysis. *BMJ*. 2013;347:f5980.
- 782 3. Subramaniam P, Ho JJ, Davis PG. Prophylactic nasal continuous  
783 positive airway pressure for preventing morbidity and mortality in very  
784 preterm infants. *Cochrane Database Syst Rev*. 2016;6:CD001243.
- 785 4. De Paoli AG, Davis PG, Faber B, Morley CJ. Devices and pressure  
786 sources for administration of nasal continuous positive airway pressure  
787 (NCPAP) in preterm neonates.  
788 *Cochrane Database Syst Rev*. 2008;1:CD002977.
- 789 5. Kieran EA, Twomey AR, Molloy EJ, Murphy JF, O'Donnell CP.  
790 Randomized trial of prongs or mask for nasal continuous positive  
791 airway pressure in preterm infants. *Pediatrics*. 2012;130:e1170-6.
- 792 6. Sweet DG, Carnielli V, Greisen G, Hallman M, Ozek E, Plavka R,  
793 Saugstad OD, Simeoni U, Speer CP, Vento M, Visser GH, Halliday HL.  
794 European Consensus Guidelines on the Management of Respiratory  
795 Distress Syndrome - 2016 Update. *Neonatology*. 2017;111:107-125.  
796  
797  
798

- 
- 799 7. Stefanescu BM, Murphy WP, Hansell BJ, Fuloria M, Morgan TM,  
800 Aschner JL. A randomized, controlled trial comparing two different  
801 continuous positive airway pressure systems for the successful  
802 extubation of extremely low birth weight infants. *Pediatrics*. 2003;  
803 112:1031–1038.
- 804 8. Barrington KJ, Bull D, Finer NN. Randomized trial of nasal  
805 synchronized intermittent mandatory ventilation compared with  
806 continuous positive airway pressure after extubation of very low birth  
807 weight infants. *Pediatrics*. 2001; 107:638–641.
- 808 9. Davis PG, Henderson-Smart DJ. Nasal continuous positive airways  
809 pressure immediately after extubation for preventing morbidity in  
810 preterm infants. *Cochrane Database Syst Rev*. 2003;(2):CD000143.
- 811 10. Greenough A. Long-term pulmonary outcome in the preterm infant.  
812 *Neonatology*. 2008; 93: 324-7.
- 813 11. Chien YH, Tsao PN, Chou HC, Tang JR, Tsou KI. Rehospitalization  
814 of extremely-low-birth-weight infants in first 2 years of life.  
815 *Early Hum Dev*. 2002; 66: 33-40.
- 816 12. Lemyre B, Davis PG, De Paoli AG, Kirpalani H. Nasal intermittent  
817 positive pressure ventilation (NIPPV) versus nasal continuous positive  
818 airway pressure (NCPAP) for preterm neonates after extubation.  
819 *Cochrane Database Syst Rev*. 2017;(2):CD003212.
- 820 13. De Luca D, Dell'Orto V. Non-invasive high-frequency oscillatory  
821 ventilation in neonates: review of physiology, biology and clinical data.  
822 *Arch Dis Child Fetal Neonatal Ed*. 2016 Jun 28. pii:  
823 fetalneonatal-2016-310664. doi: 10.1136/archdischild-2016-310664.

- 824
- 825 14. Czernik C, Schmalisch G, Bühner C, Proquitté H. Weaning of  
826 neonates from mechanical ventilation by use of nasopharyngeal high  
827 frequency oscillatory ventilation: a preliminary study. *J Matern Fetal*  
828 *Neonatal Med.* 2012; 25: 374–378.
- 829 15. Mukerji A, Sarmiento K, Lee B, Hassall K, Shah V. Non-invasive  
830 high-frequency ventilation versus bi-phasic continuous positive airway  
831 pressure (BP-CPAP) following CPAP failure in infants <1250 g: a pilot  
832 randomized controlled trial. *J Perinatol.* 2017;37:49-53.
- 833 16. De Luca D. Noninvasive high-frequency ventilation and the errors  
834 from the past: designing simple trials neglecting complex respiratory  
835 physiology. *J Perinatol.* 2017;37:1065-1066.
- 836 17. Fisher HS, Bohlin K, Bühner C, Schmalisch G, Cremer M, Reiss I,  
837 Czernik C. Nasal high-frequency oscillation ventilation in neonates: a  
838 survey in five European Countries. *Eur J Pediatr.* 2015;174:465–71.
- 839 18. Zwarenstein M, Treweek S, Gagnier JJ, Altman DG, Tunis S,  
840 Haynes B, Oxman AD, Moher D; CONSORT group; Pragmatic Trials in  
841 Healthcare (Practihc) group. Improving the reporting of pragmatic trials:  
842 an extension of the CONSORT statement.  
843 *BMJ.* 2008;337:a2390.
- 844 19. Restrepo RD, Hirst KR, Wittnebell L, Wettstein R. AARC clinical  
845 practice guideline: transcutaneous monitoring of carbon dioxide and  
846 oxygen: 2012. *Respir Care* 2012;57:1955-1962.
- 847 20. Silverman WC, Anderson DH. Controlled clinical trial on effects of  
848 water mist on obstructive respiratory signs, death rate and necropsy  
849 findings among premature infants. *Pediatrics.* 1956; 17: 1-4.

- 
- 850 21. Papile LA, Munsick-Bruno G, Schaefer A. Relationship of cerebral  
851 intraventricular hemorrhage and early childhood neurologic handicaps.  
852 J Pediatr. 1983;103:273-7.
- 853 22. Watkins AM, West CR, Cooke RW. Blood pressure and cerebral  
854 hemorrhage and ischaemia in very low birth weight infants.  
855 Early Hum Dev. 1989;19:103-10.
- 856 23. De Luca D, Romain O, Yousef N, Andriamanamirijaa D,  
857 Shankar-Aguilera S, Walls E, Sgaggero B, Aube N, Tissières P.  
858 Monitorages physiopathologiques en réanimation néonatale.  
859 J Ped Puericul. 2015; 28: 276-300. [Article in French]
- 860 24. Jobe AH, Bancalari E. Bronchopulmonary dysplasia.  
861 Am J Respir Crit Care Med. 2001;163:1723-9.
- 862 25. International Committee for the Classification of Retinopathy of  
863 Prematurity. The International Classification of Retinopathy of  
864 Prematurity revisited. Arch Ophthalmol. 2005;123:991-9.
- 865 26. Stoll BJ. Epidemiology of necrotizing enterocolitis.  
866 Clin Perinatol. 1994;21:205-18.
- 867 27. Fischer C, Bertelle V, Hohlfeld J, Forcada-Guex M,  
868 Stadelmann-Diaw C, Tolsa JF. Nasal trauma due to continuous positive  
869 airway pressure in neonates.  
870 Arch Dis Child Fetal Neonatal Ed. 2010;95:F447-51.
- 871 28. Stevens B, Johnston C, Petryshen P, Taddio A. Premature infant  
872 pain profile :developmend and initial validation.  
873 Clin J Pain. 1996;12:13-2  
874  
875



- 
- 876 29. De Paoli AG, Davis PG, Faber B, Morley CJ. Devices and pressure  
877 sources for administration of nasal continuous positive airway pressure  
878 (NCPAP) in preterm neonates.  
879 Cochrane Database Syst Rev. 2002; 3:CD002977
- 880 30. Roberts CT, Davis PG, Owen LS. Neonatal non-invasive respiratory  
881 support: synchronised NIPPV, non-synchronised NIPPV or bi-level  
882 CPAP: what is the evidence in 2013?  
883 Neonatology. 2013;104:203-9.
- 884 31. Mukerji A, Belik J. Neonatal nasal intermittent positive pressure  
885 ventilation efficacy and lung pressure transmission.  
886 J Perinatol. 2015;35:716–19.
- 887 32. Gerdes JS, Sivieri EM, Abbasi S. Factors influencing delivered  
888 mean airway pressure during nasal CPAP with the RAM cannula.  
889 Pediatr Pulmonol. 2016;51:60–9.
- 890 33. De Jaegere A, van Veenendaal MB, Michiels A, van Kaam AH.  
891 Lung recruitment using oxygenation during openlunghigh-frequency  
892 ventilation in preterm infants.  
893 Am J Respir Crit Care Med. 2006;174:639-45.
- 894 34. De Luca D, Piastra M, Pietrini D, Conti G. Effect of amplitude and  
895 inspiratory time in a bench model of non-invasive HFOV through nasal  
896 prongs. Pediatr Pulmonol. 2012;47:1012–18.
- 897 35. De Luca D, Carnielli VP, Conti G, Piastra M. Noninvasive high  
898 frequency oscillatory ventilation through nasal prongs: bench  
899 evaluation of efficacy and mechanics.  
900 Intensive Care Med. 2010;36:2094–100.  
901

- 
- 902 36. Mukerji A, Finelli M, Belik J. Nasal high-frequency oscillation for  
903 lung carbon dioxide clearance in the newborn.  
904 Neonatology. 2013;103:161–5.
- 905 37. De Luca D, Costa R, Visconti F, Piastra M, Conti G. Oscillation  
906 transmission and volume delivery during face mask-delivered HFOV in  
907 infants: Bench and in vivo study. *Pediatr Pulmonol*. 2016;51:705-12.
- 908 38. Dell’Orto V, Centorrino R, Shankar-Aguilera S, Ben-Ammar R,  
909 Yousef N, De Luca D. Noninvasive high frequency oscillatory  
910 ventilation versus noninvasive intermittent positive pressure ventilation  
911 for preterm babies developing BPD: a pilot study. E-PAS 2018 in press  
912 (Abstract to the Pediatric Academic Societies meeting 2018).
- 913 39. Ramanathan R, Sekar KC, Rasmussen M, Bhatia J, Soll RF. Nasal  
914 intermittent positive pressure ventilation after surfactant treatment for  
915 respiratory distress syndrome in preterm infants  $\leq 30$  weeks' gestation:  
916 a randomized, controlled trial. *J Perinatol*. 2012;32:336-43.
- 917 40. Faul F, Erdfelder E, Lang AG, Buchner A. G\*Power 3: A flexible  
918 statistical power analysis program for the social, behavioral, and  
919 biomedical sciences. *Behavior Research Methods*. 2003;39:175-191.
- 920 41. Parry G, Tucker J, Tarnow-Mordi W; UK Neonatal Staffing Study  
921 Collaborative Group. CRIB II: an update of the clinical risk index for  
922 babies score. *Lancet*. 2003;24;361:1789-91.
- 923 42. Allison PD. Logistic regression using the SAS system. Cary (NC,  
924 USA): SAS Institute Ed; 1999.
- 925 43. Norusis M. SPSS 13.0 advanced statistical procedures companion.  
926 Upper Saddle-River (NJ, USA): Prentice Hall; 2004.
- 927

- 
- 928 44. Shankar-Aguilera S, Taveira M, De Luca D. Neonatal ventilation  
929 trials need specific funding. *Lancet Respir Med.* 2014;2:867-869.
- 930 45. De Luca D, van Kaam AH, Tingay DG, Courtney SE, Danhaive O,  
931 Carnielli VP, Zimmermann LJ, Kneyber MCJ, Tissieres P, Brierley J,  
932 Conti G, Pillow JJ, Rimensberger PC. The Montreux definition of  
933 neonatal ARDS: biological and clinical background behind the  
934 description of a new entity. *Lancet Respir Med.* 2017;5:657-666.
- 935 46. De Luca D, Baroni S, Vento G, Piastra M, Pietrini D, Romitelli F,  
936 Capoluongo E, Romagnoli C, Conti G, Zecca E. Secretary  
937 phospholipase A2 and neonatal respiratory distress: pilot study on  
938 broncho-alveolar lavage. *Intensive Care Med.* 2008;34:1858-64.
- 939 47. Goldstein B, Giroir B, Randolph A; International Consensus  
940 Conference on Pediatric Sepsis. International pediatric sepsis  
941 consensus conference: definitions for sepsis and organ dysfunction in  
942 pediatrics. *Pediatr Crit Care Med.* 2005;6:2-8.
- 943 48. Piastra M, Yousef N, Brat R, Manzoni P, Mokhtari M, De Luca D.  
944 Lung ultrasound findings in meconium aspiration syndrome.  
945 *Early Hum Dev.* 2014;90 Suppl2:S41-3.
- 946 49. Contentin L, Ehrmann S, Giraudeau B. Heterogeneity in the  
947 definition of mechanical ventilation duration and ventilator-free days.  
948 *Am J Respir Crit Care Med.* 2014;189:998-1002.

949

---

950 *INTENTIONALLY LEFT BLANK*

---

951

952

953

954

955

956

957

958

959

960

961

962

---

963 *INTENTIONALLY LEFT BLANK*

---

964

965

966

967
