# Supplementary material for: Effectiveness of Nasal Continuous Positive Airway Pressure vs Nasal Intermittent Positive Pressure Ventilation vs Noninvasive High-Frequency Oscillatory Ventilation as Support After Extubation of Neonates Born Extremely Preterm or With More Severe Respiratory Failure: A Secondary Analysis of a Randomized Clinical Trial
Source: PubMed Central journal article supplement (PMC10318479; doi:10.1001/jamanetworkopen.2023.21644), 2023-07-03
Supplement: jamanetwopen-e2321644-s003.pdf [file jamanetwopen-e2321644-s003.pdf]

\*Indicates required information. Only first name, last name, and suffix will appear in PubMed.

| <b>*Group Name(s): Nasal Oscillation Post-Extubation (NASONE) Study Group</b> |                   |                              |                  |                                                                            |                                          |                                                         |                                                                                            |
|-------------------------------------------------------------------------------|-------------------|------------------------------|------------------|----------------------------------------------------------------------------|------------------------------------------|---------------------------------------------------------|--------------------------------------------------------------------------------------------|
| <b>*First Name and Middle Initial(s)</b>                                      | <b>*Last Name</b> | <b>*Suffix (eg, Jr, III)</b> | Academic Degrees | Institution                                                                | Location (city, state/province, country) | Role or Contribution, eg, chair, principal investigator | Group (if more than 1 Group listed in the byline) and/or Subgroup (eg, Steering Committee) |
| Xiaoyun                                                                       | Zhong             |                              | MD               | Department of neonatology, Chongqing Women and Children Health Hospital    | Chongqing,China                          | investigator                                            |                                                                                            |
| Sijie                                                                         | Song              |                              | PhD, MD          | Department of neonatology, Chongqing Women and Children Health Hospital    | Chongqing,China                          | investigator                                            |                                                                                            |
| Lan                                                                           | Zhang             |                              | MD               | Anhui province affiliated Hospital of Anhui medical university             | Hefei/Anhui, China                       | investigator                                            |                                                                                            |
| Li                                                                            | Li                |                              | MD               | Children's Hospital of The Capital Institute of Pediatrics                 | Beijing, China                           | investigator                                            |                                                                                            |
| Huiqiang                                                                      | Liu               |                              | MD               | Third Hospital, Peking University.                                         | Beijing, China                           | investigator                                            |                                                                                            |
| Xiaomei                                                                       | Tong              |                              | PhD, MD          | Third Hospital, Peking University.                                         | Beijing, China                           | investigator                                            |                                                                                            |
| Xiaojing                                                                      | Xu                |                              | MD               | the first affiliated hospital of Tsinghua University                       | Beijing, China                           | investigator                                            |                                                                                            |
| LiFeng                                                                        | Cui               |                              | PhD, MD          | the first affiliated hospital of Tsinghua University                       | Beijing, China                           | investigator                                            |                                                                                            |
| Ming                                                                          | Yi                |                              | MD               | Women and children's hospital, branch of Chongqing sanxia central hospital | Chongqing,China                          | investigator                                            |                                                                                            |
| Zhoujie                                                                       | Peng              |                              | MD               | Women and children's hospital, branch of Chongqing sanxia central hospital | Chongqing,China                          | investigator                                            |                                                                                            |
| Jie                                                                           | Li                |                              | MD               | The First Affiliated Hospital of Chongqing Medical University              | Chongqing,China                          | investigator                                            |                                                                                            |
| Dongmei                                                                       | Chen              |                              | MD               | Department of Neonatal Intensive Care Unit, Quanzhou Children's Hospital   | Quanzhou/Fujian,China                    | investigator                                            |                                                                                            |
| Weifeng                                                                       | Zhang             |                              | MD               | Department of Neonatal Intensive Care Unit, Quanzhou Children's Hospital   | Quanzhou/Fujian,China                    | investigator                                            |                                                                                            |

## Supplemental Online Content: Nonauthor Collaborators

\*Indicates required information. Only first name, last name, and suffix will appear in PubMed.

| *First Name and Middle Initial(s) | *Last Name | *Suffix (eg, Jr, III) | Academic Degrees | Institution                                                                                | Location (city, state/province, country)      | Role or Contribution, eg, chair, principal investigator | Group (if more than 1 Group listed in the byline) and/or Subgroup (eg, Steering Committee) |
|-----------------------------------|------------|-----------------------|------------------|--------------------------------------------------------------------------------------------|-----------------------------------------------|---------------------------------------------------------|--------------------------------------------------------------------------------------------|
| Xinzhu                            | Lin        |                       | PhD, MD          | Department of Neonatology, Maternal and Child Health Care Hospital of Xiamen               | Xiamen/Fujian, China                          | investigator                                            |                                                                                            |
| Bin                               | Wang       |                       | PhD,MD           | Neonatology and Pediatrics Department, Zhujiang Hospital, Southern Medical University      | Guangzhou/Guangdong, China                    | investigator                                            |                                                                                            |
| Weimin                            | Huang      |                       | MD               | Department of Neonatology, Nanfang Hospital, Southern Medical University                   | Guangzhou/Guangdong, China                    | investigator                                            |                                                                                            |
| Guangliang                        | Bi         |                       | MD               | Department of Neonatology, Nanfang Hospital, Southern Medical University                   | Guangzhou/Guangdong, China                    | investigator                                            |                                                                                            |
| Shaoru                            | He         |                       | MD               | Department of Neonatology, Guangdong Academy of Medical Science/Guangdong General Hospital | Guangzhou/Guangdong, China                    | investigator                                            |                                                                                            |
| Yumei                             | Liu        |                       | MD               | Department of Neonatology, Guangdong Academy of Medical Science/Guangdong General Hospital | Guangzhou/Guangdong, China                    | investigator                                            |                                                                                            |
| Jie                               | Yang       |                       | MD               | Department of Neonatology, Guangdong Women and Children Hospital                           | Guangzhou/Guangdong, China                    | investigator                                            |                                                                                            |
| Weiwei                            | Gao        |                       | MD               | Department of Neonatology, Guangdong Women and Children Hospital                           | Guangzhou/Guangdong, China                    | investigator                                            |                                                                                            |
| Wuhua                             | Liang      |                       | MD               | Department of Neonatology, Women and Children's Health Hospital of Yulin                   | Yulin/Guangxi Zhuang Autonomous Region, China | investigator                                            |                                                                                            |

## Supplemental Online Content: Nonauthor Collaborators

\*Indicates required information. Only first name, last name, and suffix will appear in PubMed.

| *First Name and Middle Initial(s) | *Last Name | *Suffix (eg, Jr, III) | Academic Degrees | Institution                                                                                               | Location (city, state/province, country)        | Role or Contribution, eg, chair, principal investigator | Group (if more than 1 Group listed in the byline) and/or Subgroup (eg, Steering Committee) |
|-----------------------------------|------------|-----------------------|------------------|-----------------------------------------------------------------------------------------------------------|-------------------------------------------------|---------------------------------------------------------|--------------------------------------------------------------------------------------------|
| Yaoxun                            | Wu         |                       | MD               | Department of Neonatology, Women and Children's Health Hospital of Yulin                                  | Yulin/Guangxi Zhuang Autonomous Region, China   | investigator                                            |                                                                                            |
| Xinnian                           | Pan        |                       | PhD, MD          | Department of Neonatology, Maternal and Children health care hospital of Guangxi Zhuang Autonomous Region | Nanning/Guangxi Zhuang Autonomous Region, China | investigator                                            |                                                                                            |
| Qiufen                            | Wei        |                       | PhD, MD          | Department of Neonatology, Maternal and Children health care hospital of Guangxi Zhuang Autonomous Region | Nanning/Guangxi Zhuang Autonomous Region, China | investigator                                            |                                                                                            |
| Yujun                             | Chen       |                       | PhD, MD          | Department of Pediatrics, the Second Affiliated Hospital of Guangxi Medical University                    | Nanning/Guangxi Zhuang Autonomous Region, China | investigator                                            |                                                                                            |
| Bingmei                           | Wei        |                       | MD               | Department of Pediatrics, the Second Affiliated Hospital of Guangxi Medical University                    | Nanning/Guangxi Zhuang Autonomous Region, China | investigator                                            |                                                                                            |
| Ling                              | Liu        |                       | PhD, MD          | Department of Neonatology, Guiyang Maternal and Child Health Care Hospital                                | Guiyang/Guizhou, China                          | investigator                                            |                                                                                            |
| Xinghui                           | Zheng      |                       | MD               | Department of Neonatology, The first people's Hospital of Zunyi                                           | Zunyi/Guizhou, China                            | investigator                                            |                                                                                            |
| Ding                              | Xu         |                       | MD               | Department of Neonatology, the Second Hospital of Lanzhou University                                      | Lanzhou/Gansu, China                            | investigator                                            |                                                                                            |
| Fan                               | Wang       |                       | MD               | Department of Neonatology, the Second Hospital of Lanzhou University                                      | Lanzhou/Gansu, China                            | investigator                                            |                                                                                            |
| Bin                               | Yi         |                       | MD               | Department of neonatology, GanSu provincial Maternity and Child Care hospital                             | Lanzhou/Gansu, China                            | investigator                                            |                                                                                            |

## Supplemental Online Content: Nonauthor Collaborators

\*Indicates required information. Only first name, last name, and suffix will appear in PubMed.

| *First Name and Middle Initial(s) | *Last Name | *Suffix (eg, Jr, III) | Academic Degrees | Institution                                                                                                                               | Location (city, state/province, country) | Role or Contribution, eg, chair, principal investigator | Group (if more than 1 Group listed in the byline) and/or Subgroup (eg, Steering Committee) |
|-----------------------------------|------------|-----------------------|------------------|-------------------------------------------------------------------------------------------------------------------------------------------|------------------------------------------|---------------------------------------------------------|--------------------------------------------------------------------------------------------|
| Jingyun                           | Shi        |                       | MD               | Department of neonatology, GanSu provincial Maternity and Child Care hospital                                                             | Lanzhou/Gansu, China                     | investigator                                            |                                                                                            |
| Yuning                            | Li         |                       | MD               | Department of Pediatrics, The First Hospital of Lanzou University                                                                         | Lanzhou/Gansu, China                     | investigator                                            |                                                                                            |
| Li                                | Jiang      |                       | MD               | Department of Pediatrics, The First Hospital of Lanzou University                                                                         | Lanzhou/Gansu, China                     | investigator                                            |                                                                                            |
| Chunming                          | Jiang      |                       | MD               | The First Affiliated Hospital of Harbin Medical University                                                                                | Harbin/Heilongjiang, China               | investigator                                            |                                                                                            |
| Chenghe                           | Tang       |                       | MD               | The First Affiliated Hospital of Xinxiang Medical University                                                                              | Xinxiang/Henan, China                    | investigator                                            |                                                                                            |
| Hong                              | Xiong      |                       | MD               | Neonatal Intensive Care Unit and Department of Neonatology, Zhengzhou Children's Hospital, the Children's Hospital of Zhengzhou Universit | Zhengzhou/Henan, China                   | investigator                                            |                                                                                            |
| Huiqing                           | Sun        |                       | MD               | Neonatal Intensive Care Unit and Department of Neonatology, Zhengzhou Children's Hospital, the Children's Hospital of Zhengzhou Universit | Zhengzhou/Henan, China                   | investigator                                            |                                                                                            |
| Wenqing                           | Kang       |                       | MD               | Neonatal Intensive Care Unit and Department of Neonatology, Zhengzhou Children's Hospital, the Children's Hospital of Zhengzhou Universit | Zhengzhou/Henan, China                   | investigator                                            |                                                                                            |
| Dapeng                            | Liu        |                       | MD               | Neonatal Intensive Care Unit and Department of Neonatology, Zhengzhou Children's Hospital, the Children's Hospital of Zhengzhou Universit | Zhengzhou/Henan, China                   | investigator                                            |                                                                                            |

## Supplemental Online Content: Nonauthor Collaborators

\*Indicates required information. Only first name, last name, and suffix will appear in PubMed.

| *First Name and Middle Initial(s) | *Last Name | *Suffix (eg, Jr, III) | Academic Degrees | Institution                                                                                                               | Location (city, state/province, country) | Role or Contribution, eg, chair, principal investigator | Group (if more than 1 Group listed in the byline) and/or Subgroup (eg, Steering Committee) |
|-----------------------------------|------------|-----------------------|------------------|---------------------------------------------------------------------------------------------------------------------------|------------------------------------------|---------------------------------------------------------|--------------------------------------------------------------------------------------------|
| Falin                             | Xu         |                       | PhD, MD          | Department of Neonatology, The Third affiliated Hospital of Zhengzhou University                                          | Zhengzhou/Henan, China                   | investigator                                            |                                                                                            |
| Kaihui                            | Xing       |                       | MD               | Department of Neonatal Intensive Care Unit, the Maternal and child health hospital of Hainan province                     | Haikou/Hainan, China                     | investigator                                            |                                                                                            |
| Ning                              | Yang       |                       | MD               | Department of Neonatal Intensive Care Unit, the Maternal and child health hospital of Hainan province                     | Haikou/Hainan, China                     | investigator                                            |                                                                                            |
| Fang                              | Liu        |                       | MD               | Department of Neonatal Intensive Care Unit, Bethune International Peace Hospital                                          | Shijiazhuang/Hebei, China                | investigator                                            |                                                                                            |
| Shaoguang                         | Lv         |                       | MD               | Department of Neonatal Intensive Care Unit, Bethune International Peace Hospital                                          | Shijiazhuang/Hebei, China                | investigator                                            |                                                                                            |
| Hanchu                            | Liu        |                       | MD               | Department of Neonatology, Wuhan Children's Hospital, Tongji Medical College, Huazhong University of Science & Technology | Wuhan/Hubei, China                       | investigator                                            |                                                                                            |
| Wenchao                           | Yuan       |                       | MD               | Department of Neonatology, Wuhan Children's Hospital, Tongji Medical College, Huazhong University of Science & Technology | Wuhan/Hubei, China                       | investigator                                            |                                                                                            |
| Rui                               | Cheng      |                       | MD               | Department of Neonatology, Children's Hospital of Nanjing Medical University                                              | Nanjing/Jiangsu, China                   | investigator                                            |                                                                                            |

## Supplemental Online Content: Nonauthor Collaborators

\*Indicates required information. Only first name, last name, and suffix will appear in PubMed.

| *First Name and Middle Initial(s) | *Last Name | *Suffix (eg, Jr, III) | Academic Degrees | Institution                                                                                      | Location (city, state/province, country) | Role or Contribution, eg, chair, principal investigator | Group (if more than 1 Group listed in the byline) and/or Subgroup (eg, Steering Committee) |
|-----------------------------------|------------|-----------------------|------------------|--------------------------------------------------------------------------------------------------|------------------------------------------|---------------------------------------------------------|--------------------------------------------------------------------------------------------|
| Xian                              | Shen       |                       | MD               | Department of Neonatology, Children's Hospital of Nanjing Medical University                     | Nanjing/Jiangsu, China                   | investigator                                            |                                                                                            |
| Hui                               | Wu         |                       | MD               | Department of Neonatology, the First Hospital of Jilin University                                | Changchun/Jilin, China                   | investigator                                            |                                                                                            |
| Laishuan                          | Wang       |                       | PhD, MD          | Department of neonatology, Children's hospital of Fudan University                               | Shanghai, China                          | investigator                                            |                                                                                            |
| Zhenying                          | Yang       |                       | MD               | Department of Neonatology, Maternal and Children's Healthcare Hospital of Taian                  | Taian/Shandong, China                    | investigator                                            |                                                                                            |
| Xiao                              | Zhang      |                       | MD               | Department of Neonatology, Maternal and Children's Healthcare Hospital of Taian                  | Taian/Shandong, China                    | investigator                                            |                                                                                            |
| Jiang                             | Xue        |                       | MD               | Department of neonatal intensive care unit, the second hospital of Shandong University           | Jinan/Shandong, China                    | investigator                                            |                                                                                            |
| Zhankui                           | Li         |                       | MD               | Department of Neonatology, North-West Women and Children's Hospital                              | Xi'an/Shanxi, China                      | investigator                                            |                                                                                            |
| Rong                              | Ju         |                       | MD               | Department of Neonatal Intensive Care Unit, the Women and Children's \Center Hospital of Chengdu | Chengdu/Sichuan, China                   | investigator                                            |                                                                                            |
| Jin                               | Wang       |                       | MD               | Department of Neonatal Intensive Care Unit, the Women and Children's \Center Hospital of Chengdu | Chengdu/Sichuan, China                   | investigator                                            |                                                                                            |
| Wenbin                            | Dong       |                       | MD               | Department of Newborn Medicine, the Affiliated Hospital of Southwest Medical University          | Luzhou/Sichuan, China                    | investigator                                            |                                                                                            |

## Supplemental Online Content: Nonauthor Collaborators

\*Indicates required information. Only first name, last name, and suffix will appear in PubMed.

| *First Name and Middle Initial(s) | *Last Name | *Suffix (eg, Jr, III) | Academic Degrees | Institution                                                                                          | Location (city, state/province, country)       | Role or Contribution, eg, chair, principal investigator | Group (if more than 1 Group listed in the byline) and/or Subgroup (eg, Steering Committee) |
|-----------------------------------|------------|-----------------------|------------------|------------------------------------------------------------------------------------------------------|------------------------------------------------|---------------------------------------------------------|--------------------------------------------------------------------------------------------|
| Xiaoxiu                           | Ye         |                       | MD               | Department of Newborn Medicine, Hospital Affiliated to Southwest Medical University                  | Luzhou/Sichuan, China                          | investigator                                            |                                                                                            |
| Benqing                           | Wu         |                       | MD               | Department of Neonatology, Shenzhen People's hospital/the Second Medical College of Jinan University | Shenzhen/Guangdong, China                      | investigator                                            |                                                                                            |
| Jun                               | Zheng      |                       | MD               | Department of Neonatology, Tianjin Central Hospital of Obstetrics and Gynecology                     | Tianjin, China                                 | investigator                                            |                                                                                            |
| Xiuying                           | Tian       |                       | MD               | Department of Neonatology, Tianjin Central Hospital of Obstetrics and Gynecology                     | Tianjin, China                                 | investigator                                            |                                                                                            |
| Mingxia                           | Li         |                       | MD               | Department of Neonatology, the first affiliated hospital of Xinjiang Medical University              | Urumqi/Xinjiang Uygur Autonomous Region, China | investigator                                            |                                                                                            |
| Yanping                           | Zhu        |                       | MD               | Department of Neonatology, the first affiliated hospital of Xinjiang Medical University              | Urumqi/Xinjiang Uygur Autonomous Region, China | investigator                                            |                                                                                            |
| Nuerya                            | Rejiafu    |                       | MD               | Department of Neonatology, People's Hospital of Xinjiang Uygur Autonomous Region                     | Urumqi/Xinjiang Uygur Autonomous Region, China | investigator                                            |                                                                                            |
| Long                              | Li         |                       | MD               | Department of Neonatology, People's Hospital of Xinjiang Uygur Autonomous Region                     | Urumqi/Xinjiang Uygur Autonomous Region, China | investigator                                            |                                                                                            |
| Yangfang                          | Li         |                       | MD               | Department of neonatology, children's hospital of Kunming medical university                         | Kunming/Yunnan, China                          | investigator                                            |                                                                                            |
| Canlin                            | He         |                       | MD               | Department of neonatology, children's hospital of Kunming medical university                         | Kunming/Yunnan, China                          | investigator                                            |                                                                                            |

## Supplemental Online Content: Nonauthor Collaborators

\*Indicates required information. Only first name, last name, and suffix will appear in PubMed.

| *First Name and Middle Initial(s) | *Last Name | *Suffix (eg, Jr, III) | Academic Degrees | Institution                                                                                          | Location (city, state/province, country)      | Role or Contribution, eg, chair, principal investigator | Group (if more than 1 Group listed in the byline) and/or Subgroup (eg, Steering Committee) |
|-----------------------------------|------------|-----------------------|------------------|------------------------------------------------------------------------------------------------------|-----------------------------------------------|---------------------------------------------------------|--------------------------------------------------------------------------------------------|
| Li                                | Li         |                       | MD               | Pediatric Department, the first people's hospital of Yunnan province                                 | Kunming/Yunnan, China                         | investigator                                            |                                                                                            |
| Hongying                          | Mi         |                       | MD               | Pediatric Department, the first people's hospital of Yunnan province                                 | Kunming/Yunnan, China                         | investigator                                            |                                                                                            |
| Kun                               | Liang      |                       | PhD, MD          | Department of Pediatrics, the first affiliated hospital of Kunming Medical University                | Kunming/Yunnan, China                         | investigator                                            |                                                                                            |
| Hong                              | Cao        |                       | MD               | Department of Neonatal Intensive Care Unit, Yan'an Hospital Affiliated to Kunming Medical University | Kunming/Yunnan, China                         | investigator                                            |                                                                                            |
| Linlin                            | Xia        |                       | MD               | Department of Neonatal Intensive Care Unit, Yan'an Hospital Affiliated to Kunming Medical University | Kunming/Yunnan, China                         | investigator                                            |                                                                                            |
| Chuanfeng                         | Li         |                       | MD               | Department of Neonatology, Women and Children's Health Hospital of Qujing                            | Qujing/Yunnan, China                          | investigator                                            |                                                                                            |
| Zhaoqing                          | Yin        |                       | MD               | Department of neonatology, The people's hospital of Dehong autonomous prefecture                     | Dehong autonomous prefecture/Yunan, China     | investigator                                            |                                                                                            |
| Le                                | Su         |                       | MD               | Department of neonatology, The people's hospital of Dehong autonomous prefecture                     | Dehong autonomous prefecture/Yunan, China     | investigator                                            |                                                                                            |
| Yanxiang                          | Chen       |                       | MD               | Department of Neonatology, Yinchuan No.1 people's Hospital Affiliated of Ningxia Medical University  | Yinchuan/Ningxia Hui Autonomous Region, China | investigator                                            |                                                                                            |



## Supplemental Online Content: Nonauthor Collaborators

\*Indicates required information. Only first name, last name, and suffix will appear in PubMed.

| *First Name and Middle Initial(s) | *Last Name | *Suffix (eg, Jr, III) | Academic Degrees | Institution                                                                                                   | Location (city, state/province, country) | Role or Contribution, eg, chair, principal investigator | Group (if more than 1 Group listed in the byline) and/or Subgroup (eg, Steering Committee) |
|-----------------------------------|------------|-----------------------|------------------|---------------------------------------------------------------------------------------------------------------|------------------------------------------|---------------------------------------------------------|--------------------------------------------------------------------------------------------|
| Liping                            | Shi        |                       | PhD, MD          | Department of Neonatal Intensive Care Unit, The Children's Hospital of Zhejiang University School of Medicine | Hangzhou/Zhejiang, China                 | investigator                                            |                                                                                            |
| Chenhong                          | Wang       |                       | MD               | Department of Neonatal Intensive Care Unit, The Children's Hospital of Zhejiang University School of Medicine | Hangzhou/Zhejiang, China                 | investigator                                            |                                                                                            |
| Jiajun                            | Zhu        |                       | PhD, MD          | Department of Neonatology, Women's Hospital, School of Medicine, Zhejiang University                          | Hangzhou/Zhejiang, China                 | investigator                                            |                                                                                            |
| Xuefeng                           | Zhang      |                       | MD               | Department of Neonatology, 302 Military hospital of china, People Liberation Army of China                    | Beijing, China                           | investigator                                            |                                                                                            |
| Xirong                            | Gao        |                       | MD               | Department of Neonatology, Hunan Children's hospital                                                          | Changsha/Hunan, China                    | investigator                                            |                                                                                            |
| Bo                                | Lv         |                       | MD               | Department of Neonatology, Hunan Children's hospital.                                                         | Changsha/Hunan, China                    | investigator                                            |                                                                                            |
| Chongde                           | Liu        |                       | MD               | Department of Neonatology, Women and Children's Hospital of Qinghai                                           | Xining/Qinghai, China                    | investigator                                            |                                                                                            |
| Xiaorong                          | Wang       |                       | MD               | Department of Neonatology, Women and Children's Hospital of Qinghai                                           | Xining/Qinghai, China                    | investigator                                            |                                                                                            |
| Liping                            | Chen       |                       | MD               | Department of Neonatology, Jiangxi Provincial Children's Hospital                                             | Nanchang/Jiangxi, China                  | investigator                                            |                                                                                            |
| Lin                               | Li         |                       | MD               | Department of Neonatology, Jiangxi Provincial Children's Hospital                                             | Nanchang/Jiangxi, China                  | investigator                                            |                                                                                            |

## Supplemental Online Content: Nonauthor Collaborators

\*Indicates required information. Only first name, last name, and suffix will appear in PubMed.

| *First Name and Middle Initial(s) | *Last Name | *Suffix (eg, Jr, III) | Academic Degrees | Institution                                                                                              | Location (city, state/province, country)        | Role or Contribution, eg, chair, principal investigator | Group (if more than 1 Group listed in the byline) and/or Subgroup (eg, Steering Committee) |
|-----------------------------------|------------|-----------------------|------------------|----------------------------------------------------------------------------------------------------------|-------------------------------------------------|---------------------------------------------------------|--------------------------------------------------------------------------------------------|
| Chunli                            | Zhang      |                       | MD               | Department of Neonatology, Inner Mongolia People's Hospital                                              | Hohhot/Inner Mongolia, China.                   | investigator                                            |                                                                                            |
| Jia                               | Chen       |                       | MD               | Department of Neonatology, Mianyang central hospital                                                     | Mianyang/Sichuan, China                         | investigator                                            |                                                                                            |
| Qiyu                              | Li         |                       | MD               | Department of Pediatrics, 202 Military hospital of People's Liberation Army of China                     | Shenyang/Liaoning, China                        | investigator                                            |                                                                                            |
| Qin                               | Lv         |                       | MD               | Infant Intensive Care Unit, Ningbo women and children hospital                                           | Ningbo/Zhejiang, China                          | investigator                                            |                                                                                            |
| Yanhong                           | Li         |                       | MD               | Infant Intensive Care Unit, Ningbo women and children hospital                                           | Ningbo/Zhejiang, China                          | investigator                                            |                                                                                            |
| Yong                              | Ji         |                       | MD               | Children's hospital of Shanxi                                                                            | Taiyuan/Shanxi, China                           | investigator                                            |                                                                                            |
| Yanjiang                          | Chen       |                       | MD               | Children's hospital of Shanxi                                                                            | Taiyuan/Shanxi, China                           | investigator                                            |                                                                                            |
| Jianhua                           | Sun        |                       | PhD, MD          | Department of Neonatology, Shanghai Children's Medical Center                                            | Shanghai, China                                 | investigator                                            |                                                                                            |
| Jun                               | Bu         |                       | MD               | Department of Neonatology, Shanghai Children's Medical Center                                            | Shanghai, China                                 | investigator                                            |                                                                                            |
| Danni                             | Zhong      |                       | PhD, MD          | Department of Pediatrics, The First Affiliated Hospital of Guangxi Medical University                    | Nanning/Guangxi Zhuang Autonomous Region, China | investigator                                            |                                                                                            |
| Zongyan                           | Cao        |                       | MD               | Department of Pediatrics, The First Affiliated Hospital of Guangxi Medical University                    | Nanning/Guangxi Zhuang Autonomous Region, China | investigator                                            |                                                                                            |
| Shuping                           | Han        |                       | MD               | Department of Pediatrics, Obstetrics and Gynecology Hospital of Affiliated to Nanjing Medical University | Nanjing/Jiangsu, China                          | investigator                                            |                                                                                            |
| Xiaohui                           | Chen       |                       | MD               | Department of Pediatrics, Obstetrics and Gynecology Hospital of Affiliated to Nanjing Medical University | Nanjing/Jiangsu, China                          | investigator                                            |                                                                                            |

## Supplemental Online Content: Nonauthor Collaborators

\*Indicates required information. Only first name, last name, and suffix will appear in PubMed.

| *First Name and Middle Initial(s) | *Last Name | *Suffix (eg, Jr, III) | Academic Degrees | Institution                                                                    | Location (city, state/province, country) | Role or Contribution, eg, chair, principal investigator | Group (if more than 1 Group listed in the byline) and/or Subgroup (eg, Steering Committee) |
|-----------------------------------|------------|-----------------------|------------------|--------------------------------------------------------------------------------|------------------------------------------|---------------------------------------------------------|--------------------------------------------------------------------------------------------|
| Caiyun                            | Gao        |                       | MD               | Pediatric Department, Qinhuangdao maternal and child health care hospital      | Qinhuangdao/Hebei, China                 | investigator                                            |                                                                                            |
| Hongbin                           | Zhu        |                       | MD               | Pediatric Department, Qinhuangdao maternal and child health care hospital      | Qinhuangdao/Hebei, China                 | investigator                                            |                                                                                            |
| Zhenguang                         | Li         |                       | MD               | Xuzhou Children Hospital                                                       | Xuzhou/Jiangsu, China                    | investigator                                            |                                                                                            |
| Hongwei                           | Wu         |                       | MD               | Xuzhou Children Hospital.                                                      | Xuzhou/Jiangsu, China                    | investigator                                            |                                                                                            |
| Xiuyong                           | Cheng      |                       | PhD, MD          | The first affiliated hospital of Zhengzhou university                          | Zhengzhou/Henan, China                   | investigator                                            |                                                                                            |
| Juhua                             | Li         |                       | MD               | Department of Pediatrics, Xianyang children's Hospital                         | Xianyang/Shanxi, China                   | investigator                                            |                                                                                            |
| Long                              | Chen       |                       | MD               | Department of Pediatrics, Daping hospital of Third Military Medical University | Chongqing, China                         | investigator                                            |                                                                                            |
| Huanhuan                          | Li         |                       | MD               | Department of Neonatology JiulongpoPeople's Hospital                           | Chongqing, China                         | investigator                                            |                                                                                            |
