# Supplementary material for: Effectiveness of Nasal Continuous Positive Airway Pressure vs Nasal Intermittent Positive Pressure Ventilation vs Noninvasive High-Frequency Oscillatory Ventilation as Support After Extubation of Neonates Born Extremely Preterm or With More Severe Respiratory Failure: A Secondary Analysis of a Randomized Clinical Trial
Source: PubMed Central journal article supplement (PMC10318479; doi:10.1001/jamanetworkopen.2023.21644), 2023-07-03
Supplement: jamanetwopen-e2321644-s004.pdf [file jamanetwopen-e2321644-s004.pdf]

## Data Sharing Statement

Zhu. Effectiveness of Nasal Continuous Positive Airway Pressure vs Nasal Intermittent Positive Pressure Ventilation vs Noninvasive High-Frequency Oscillatory Ventilation as Support After Extubation of Neonates Born Extremely Preterm or With More Severe Respiratory Failure. *JAMA Netw Open*. Published July 03, 2023. doi:10.1001/jamanetworkopen.2023.21644

### Data

**Data available:** The raw data are available upon reasonable request.
